# Supplementary material for: Facile high-yield synthesis of unsymmetric end-off compartmental double Schiff-base ligands: easy access to mononuclear precursor and unsymmetric dinuclear complexes
Source: Royal Society of Chemistry journal article supplement (doi:10.1039/c6ra16870a), 2016-01-01
Supplement: c6ra16870a1.pdf [file c6ra16870a1.pdf]

**Supporting information for:**

**Facile high-yield synthesis of unsymmetric  
end-off compartmental double Schiff-base  
ligands: easy access to mononuclear precursor  
and unsymmetric dinuclear complexes**

Markus Schmidt, Helmar Görls, and Winfried Plass\*

*Institut für Anorganische und Analytische Chemie, Friedrich-Schiller-Universität Jena,  
Humboldtstr. 8, 07743 Jena, Germany.*

E-mail: [sekr.plass@uni-jena.de](mailto:sekr.plass@uni-jena.de)

Phone: +49 3641 948130. Fax: +49 3641 948132

Table S1: Crystallographic data and structure refinement parameters for [Ni(tsc-difo)PPh<sub>3</sub>] $\cdot$ 2MeOH and [Zn<sub>2</sub>(tsc-hydra)(OAc)<sub>2</sub>] $\cdot$ MeCN $\cdot$ H<sub>2</sub>O

|                                                  | [Ni(tsc-difo)PPh <sub>3</sub> ] $\cdot$ 2MeOH                      | [Zn <sub>2</sub> (tsc-hydra)(OAc) <sub>2</sub> ] $\cdot$ MeCN $\cdot$ H <sub>2</sub> O |
|--------------------------------------------------|--------------------------------------------------------------------|----------------------------------------------------------------------------------------|
| formula                                          | C <sub>30</sub> H <sub>32</sub> N <sub>3</sub> NiO <sub>4</sub> PS | C <sub>30</sub> H <sub>36</sub> N <sub>8</sub> O <sub>6</sub> SZn <sub>2</sub>         |
| formula weight (g mol <sup>-1</sup> )            | 620.33                                                             | 767.47                                                                                 |
| color                                            | brown                                                              | yellow                                                                                 |
| crystal size (mm)                                | 0.045 $\times$ 0.034 $\times$ 0.032                                | 0.060 $\times$ 0.060 $\times$ 0.040                                                    |
| crystal system                                   | monoclinic                                                         | monoclinic                                                                             |
| space group                                      | <i>P</i> 2 <sub>1</sub> / <i>n</i>                                 | <i>P</i> 2 <sub>1</sub> / <i>n</i>                                                     |
| <i>a</i> (pm)                                    | 1483.10(6)                                                         | 1347.46(8)                                                                             |
| <i>b</i> (pm)                                    | 767.72(3)                                                          | 1502.26(11)                                                                            |
| <i>c</i> (pm)                                    | 2582.78(9)                                                         | 1667.45(12)                                                                            |
| $\alpha$ (°)                                     | 90                                                                 | 90                                                                                     |
| $\beta$ (°)                                      | 93.346(1)                                                          | 93.667(4)                                                                              |
| $\gamma$ (°)                                     | 90                                                                 | 90                                                                                     |
| <i>V</i> (10 <sup>6</sup> pm <sup>3</sup> )      | 2935.75(19)                                                        | 3368.4(4)                                                                              |
| <i>Z</i>                                         | 4                                                                  | 4                                                                                      |
| <i>T</i> (K)                                     | 133(2)                                                             | 133(2)                                                                                 |
| $\rho_{\text{calc}}$ (g cm <sup>-3</sup> )       | 1.403                                                              | 1.513                                                                                  |
| <i>F</i> (000)                                   | 1296                                                               | 1584                                                                                   |
| $\mu$ (Mo K $\alpha$ ) (mm <sup>-1</sup> )       | 0.826                                                              | 1.540                                                                                  |
| $\Theta$ range of data collection (°)            | 2.67–27.45                                                         | 2.42–27.49                                                                             |
| measured reflections                             | 16312                                                              | 15345                                                                                  |
| unique reflections ( <i>R</i> <sub>int</sub> )   | 6439 (0.0333)                                                      | 6769 (0.0447)                                                                          |
| no. of parameters                                | 450                                                                | 457                                                                                    |
| goodness-of-fit on <i>F</i> <sup>2</sup>         | 1.124                                                              | 1.177                                                                                  |
| <i>R</i> 1 ( <i>I</i> > 2 $\sigma$ ( <i>I</i> )) | 0.0478                                                             | 0.0565                                                                                 |
| <i>wR</i> 2 (all data)                           | 0.1226                                                             | 0.1176                                                                                 |

Table S2: Selected  $^{13}\text{C}$  NMR data for mono and double Schiff bases ( $\delta/\text{ppm}$ )

| Ligand                   | C1    | C2    | C3    | C4    | C5    | C6    | C7    | C8    | C9   | C10   |
|--------------------------|-------|-------|-------|-------|-------|-------|-------|-------|------|-------|
| H <sub>2</sub> sc-difo   | 156.3 | 135.5 | 122.2 | 134.1 | 128.8 | 132.3 | 121.9 | 156.4 | 19.7 | 194.6 |
| H <sub>2</sub> tsc-difo  | 177.9 | 137.1 | 122.1 | 134.2 | 129.1 | 134.3 | 121.8 | 156.7 | 19.7 | 195.7 |
| H <sub>2</sub> sc-hydra  | 156.8 | 134.6 | 122.3 | 128.9 | 126.2 | 132.7 | 118.2 | 158.8 | 20.0 | 166.5 |
| H <sub>2</sub> tsc-hydra | 177.7 | 137.8 | 121.9 | 129.7 | 125.9 | 133.7 | 118.0 | 160.5 | 19.9 | 166.5 |
| H <sub>2</sub> sc-ampy   | 156.8 | 134.2 | 121.0 | 129.0 | 127.0 | 132.9 | 118.5 | 157.6 | 19.9 | 167.5 |
| H <sub>2</sub> tsc-ampy  | 177.8 | 137.3 | 121.5 | 129.4 | 126.9 | 133.9 | 118.5 | 158.6 | 19.9 | 167.5 |
| H <sub>3</sub> sc-amph   | 156.8 | 134.4 | 122.1 | 129.3 | 127.1 | 133.4 | 119.3 | 157.6 | 20.0 | 161.4 |
| H <sub>3</sub> tsc-amph  | 177.8 | 137.4 | 121.6 | 129.8 | 127.1 | 134.3 | 119.3 | 158.6 | 20.0 | 161.3 |

Table S3: Bond angles at the nickel(II) ion in the crystal structure of [Ni(tsc-difo)PPh<sub>3</sub>] $\cdot$ 2MeOH (in deg)

|          |           |
|----------|-----------|
| S-Ni-P   | 91.46(3)  |
| S-Ni-O1  | 174.29(7) |
| P-Ni-O1  | 86.39(6)  |
| O1-Ni-N3 | 95.13(10) |
| S-Ni-N3  | 87.33(8)  |
| P-Ni-N3  | 176.35(8) |

Table S4: Bond angles at the zinc(II) ions in the crystal structure of  $[\text{Zn}_2(\text{tsc-hydra})(\text{OAc})_2]\cdot\text{MeCN}\cdot\text{H}_2\text{O}$  (in deg)

|           |            |           |            |
|-----------|------------|-----------|------------|
| S–Zn1–O1  | 150.00(9)  | O1–Zn2–O4 | 75.22(11)  |
| S–Zn1–O2  | 115.13(10) | O1–Zn2–N4 | 85.40(12)  |
| S–Zn1–O4  | 100.29(9)  | O1–Zn2–N5 | 161.90(12) |
| S–Zn1–N3  | 82.40(10)  | O1–Zn2–N6 | 113.57(13) |
| O1–Zn1–O2 | 94.40(13)  | O1–Zn2–N7 | 96.30(13)  |
| O1–Zn1–O4 | 76.00(11)  | O4–Zn2–N4 | 155.62(13) |
| O1–Zn1–N3 | 84.53(12)  | O4–Zn2–N5 | 121.10(12) |
| O2–Zn1–O4 | 104.21(13) | O4–Zn2–N6 | 87.48(13)  |
| O2–Zn1–N3 | 105.96(13) | O4–Zn2–N7 | 93.62(13)  |
| O4–Zn1–N3 | 145.09(13) | N4–Zn2–N5 | 80.55(13)  |
|           |            | N4–Zn2–N6 | 86.87(15)  |
|           |            | N4–Zn2–N7 | 103.22(15) |
|           |            | N5–Zn2–N6 | 77.15(14)  |
|           |            | N6–Zn2–N7 | 76.06(14)  |
|           |            | N6–Zn2–N7 | 149.27(14) |

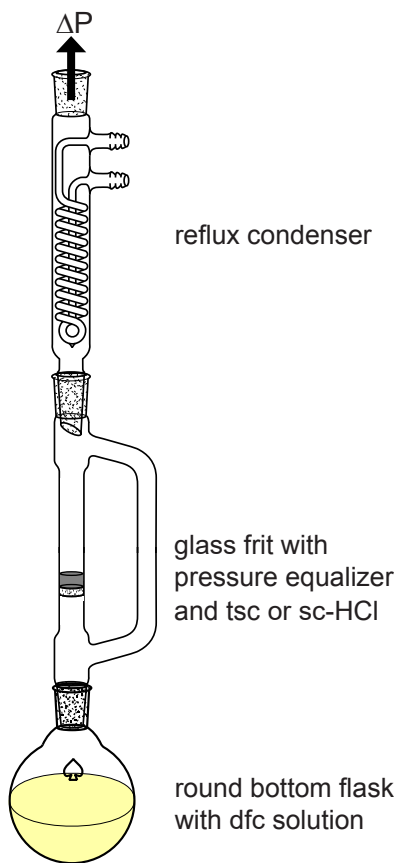

Figure S1: Experimental setup for the synthesis of the proligands  $H_2sc$ -difo and  $H_2tsc$ -difo in gram scale and high purity.

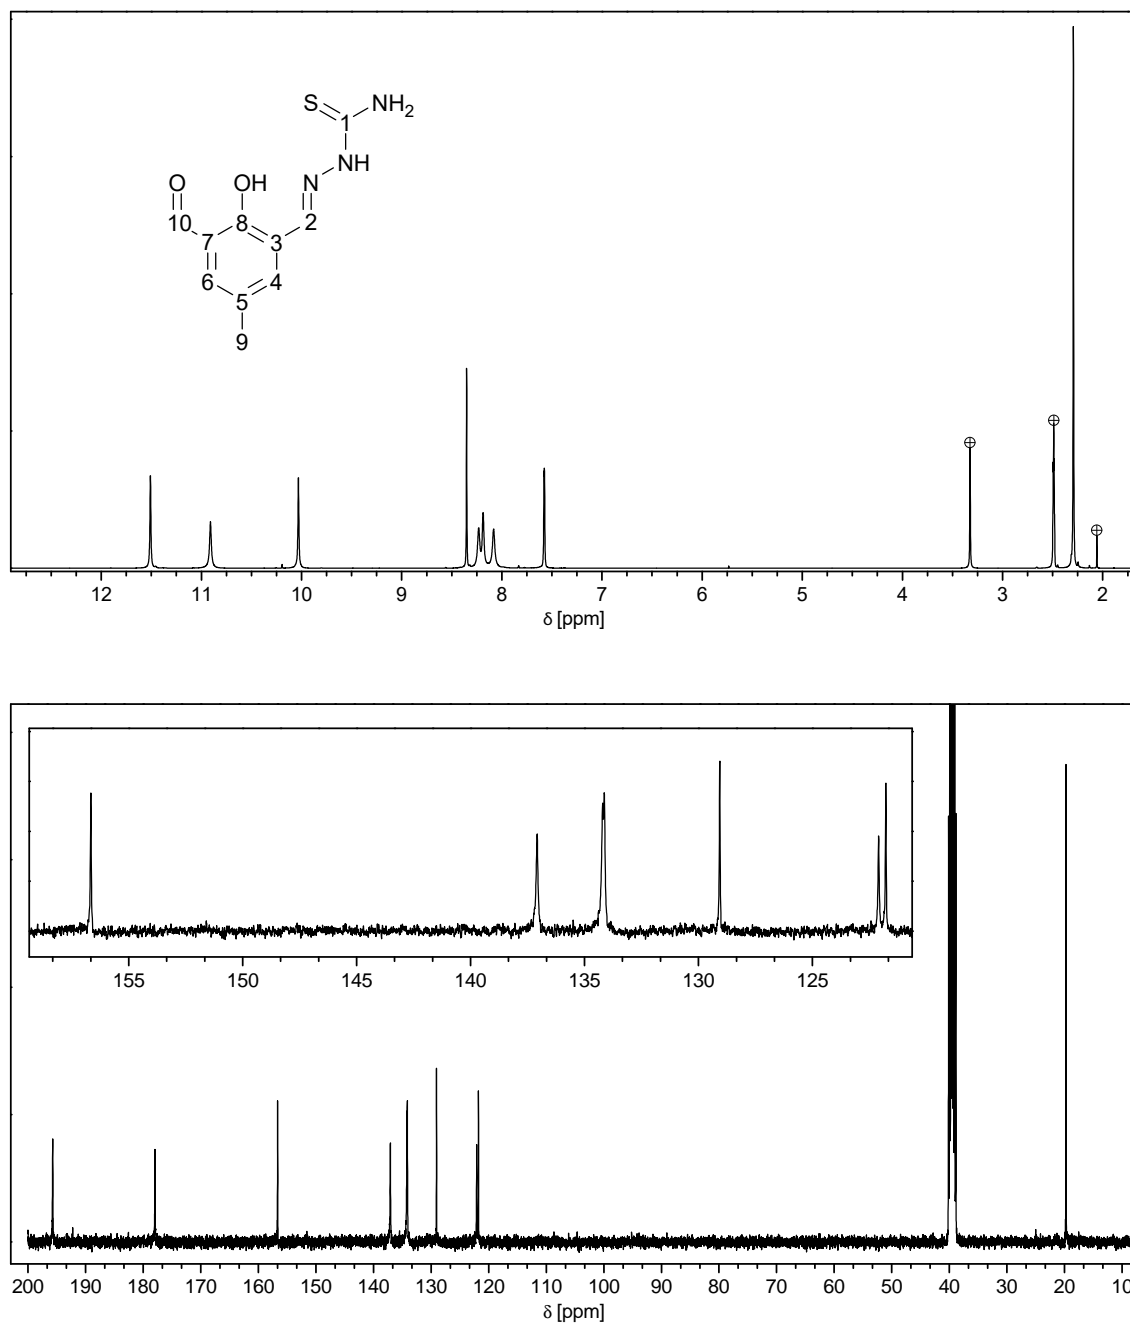

Figure S2: NMR spectra of H<sub>2</sub>tsc-difo in DMSO-d<sub>6</sub>: (Top) <sup>1</sup>H NMR; marked peaks correspond to water, acetonitrile and DMSO. (Bottom) <sup>13</sup>C{<sup>1</sup>H} NMR.

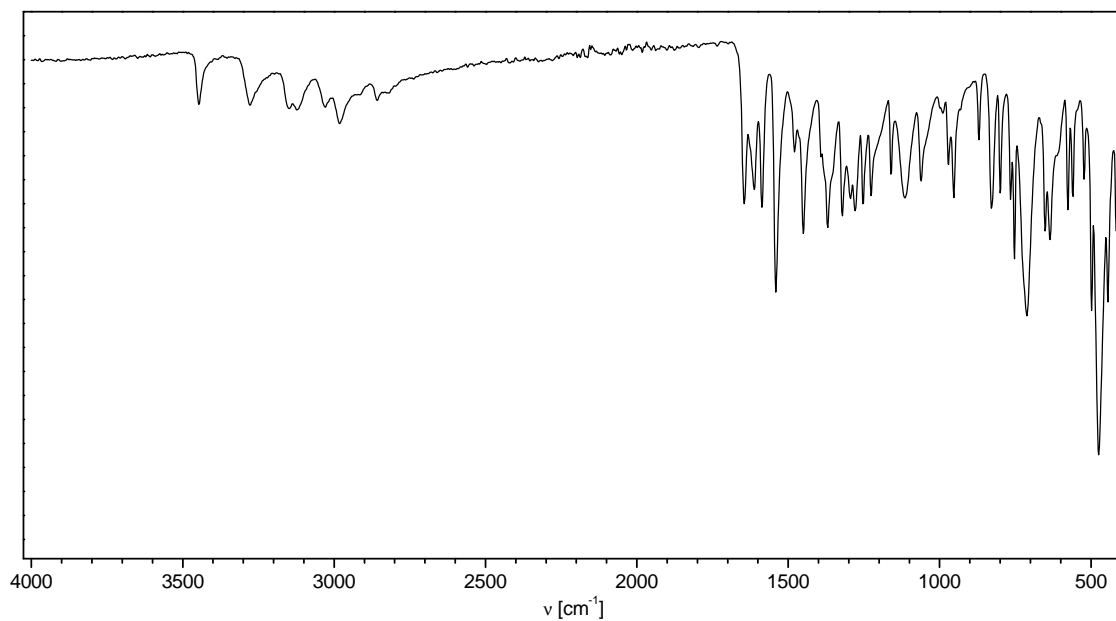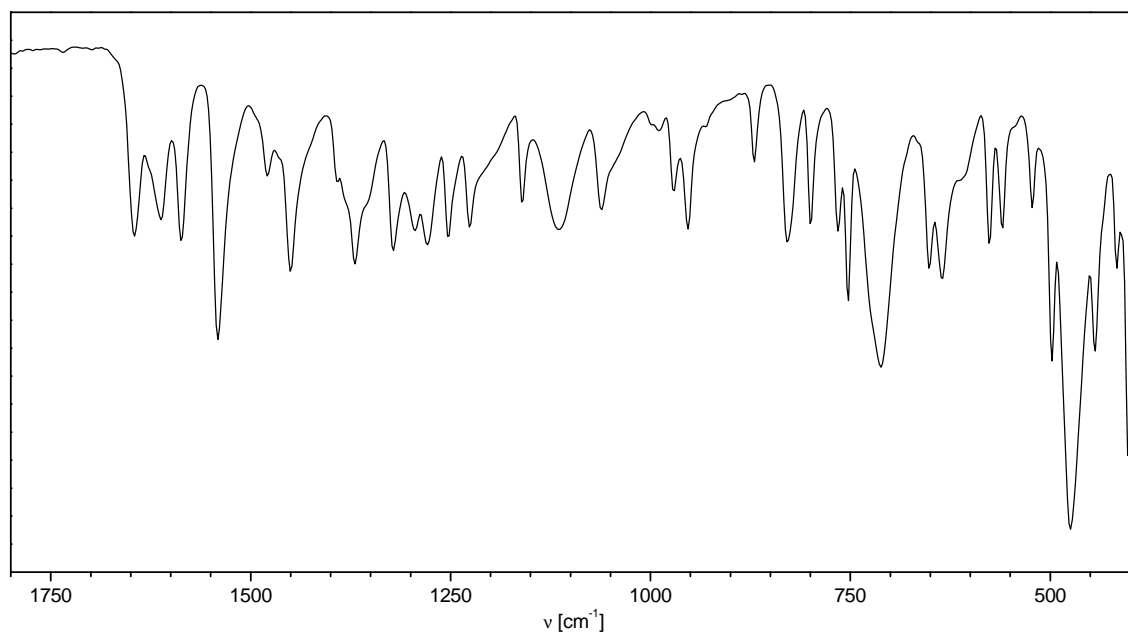

Figure S3: FT-IR spectra of H<sub>2</sub>tsc-difo: (Top) Overview range from 4000–400 cm<sup>-1</sup>. (Bottom) Fingerprint region from 1800–400 cm<sup>-1</sup>. List of the positions of vibrational bands (in cm<sup>-1</sup>): 3447, 3278, 3150, 3124, 3034, 2981, 2857, 1644, 1614, 1584, 1540, 1480, 1448, 1370, 1319, 1277, 1251, 1223, 1159, 1112, 1058, 971, 952, 872, 827, 798, 767, 753, 714, 650, 634, 577, 560, 521, 478, 444, 415, 404.



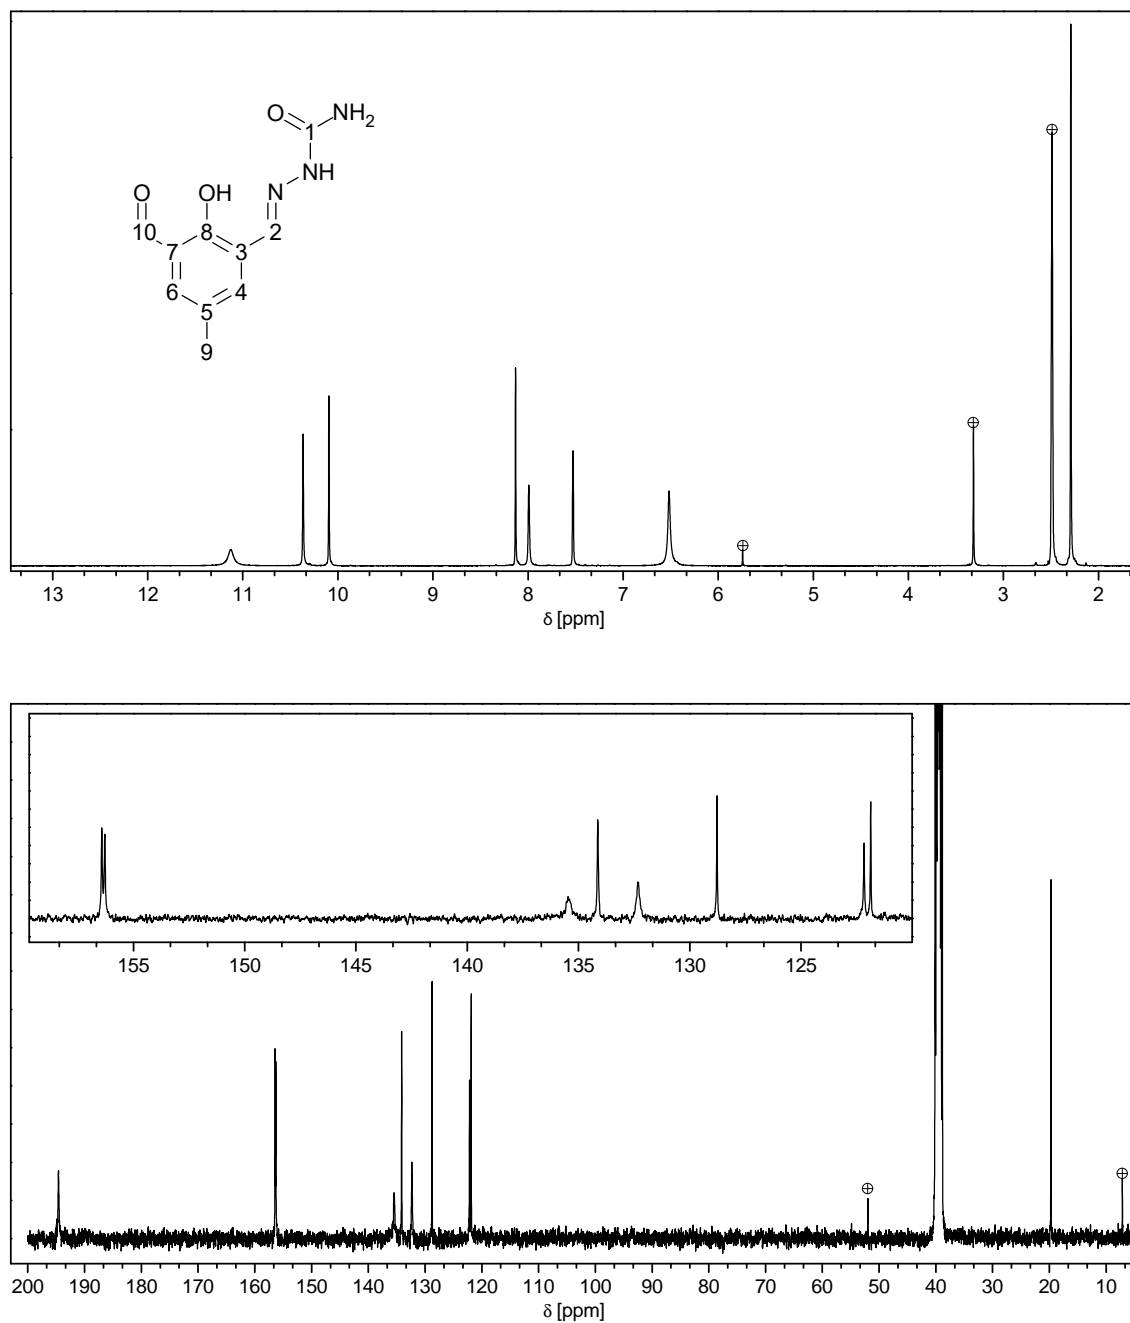

Figure S4: NMR spectra of H<sub>2</sub>tsc-difo in DMSO-d<sub>6</sub>: (Top) <sup>1</sup>H NMR; marked peaks correspond to water, dichloromethane and DMSO. (Bottom) <sup>13</sup>C{<sup>1</sup>H} NMR; marked peaks correspond diethyl ether.

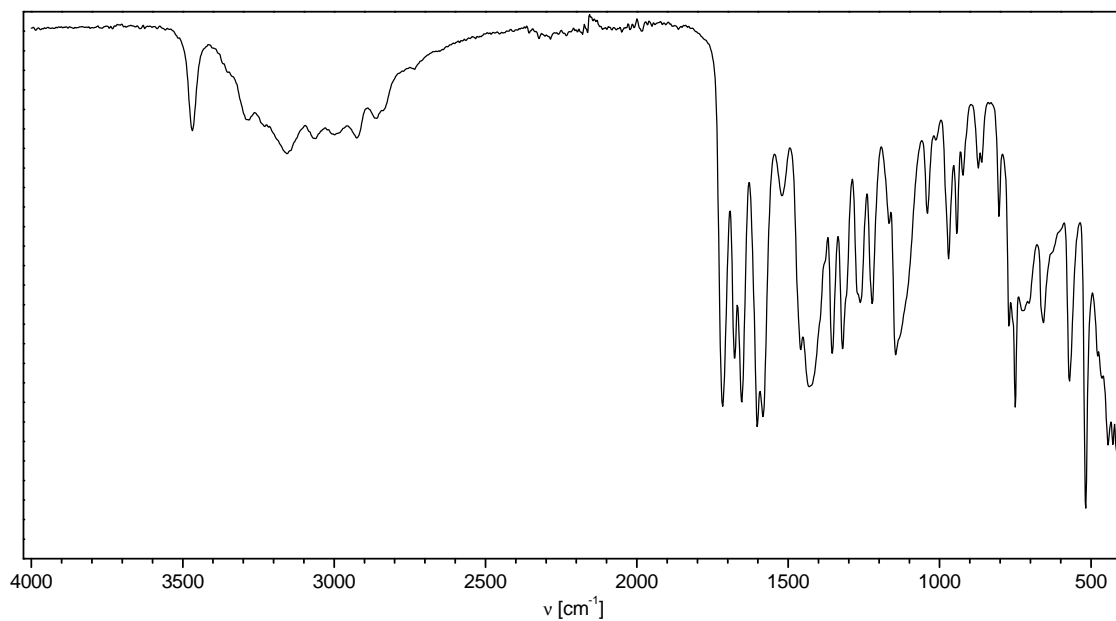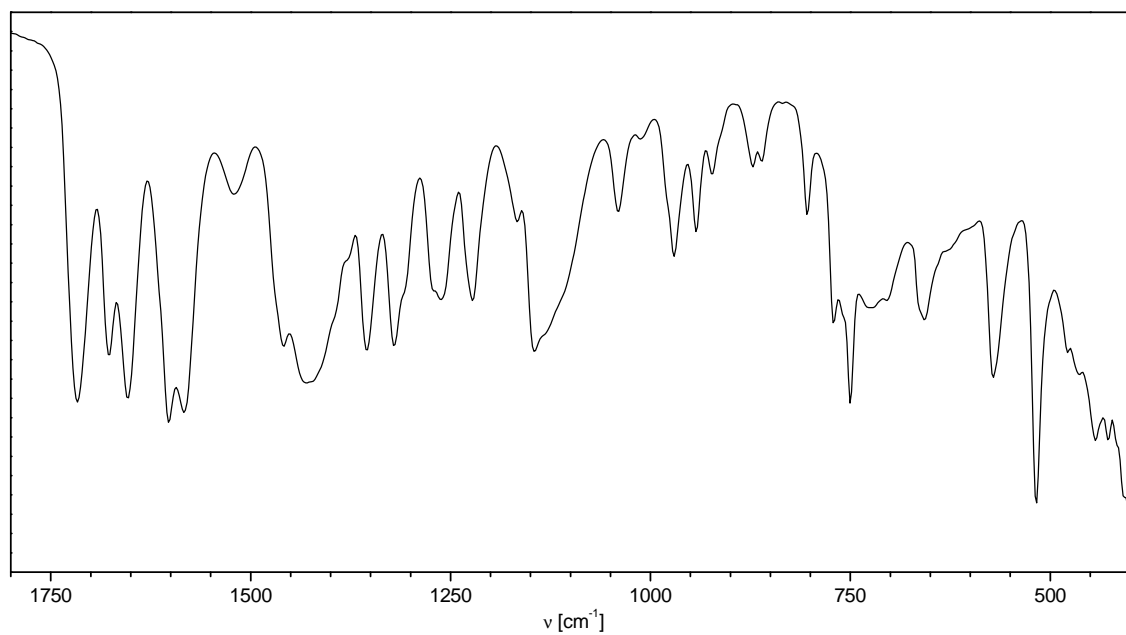

Figure S5: FT-IR spectra of H<sub>2</sub>sc-difo: (Top) Overview range from 4000–400 cm<sup>-1</sup>. (Bottom) Fingerprint region from 1800–400 cm<sup>-1</sup>. List of the positions of vibrational bands (in cm<sup>-1</sup>): 3469, 3288, 3158, 3064, 2998, 2922, 2865, 1714, 1675, 1652, 1602, 1582, 1517, 1463, 1428, 1355, 1321, 1261, 1222, 1170, 1145, 1039, 968, 941, 923, 875, 858, 804, 772, 751, 724, 657, 573, 518, 445, 401.

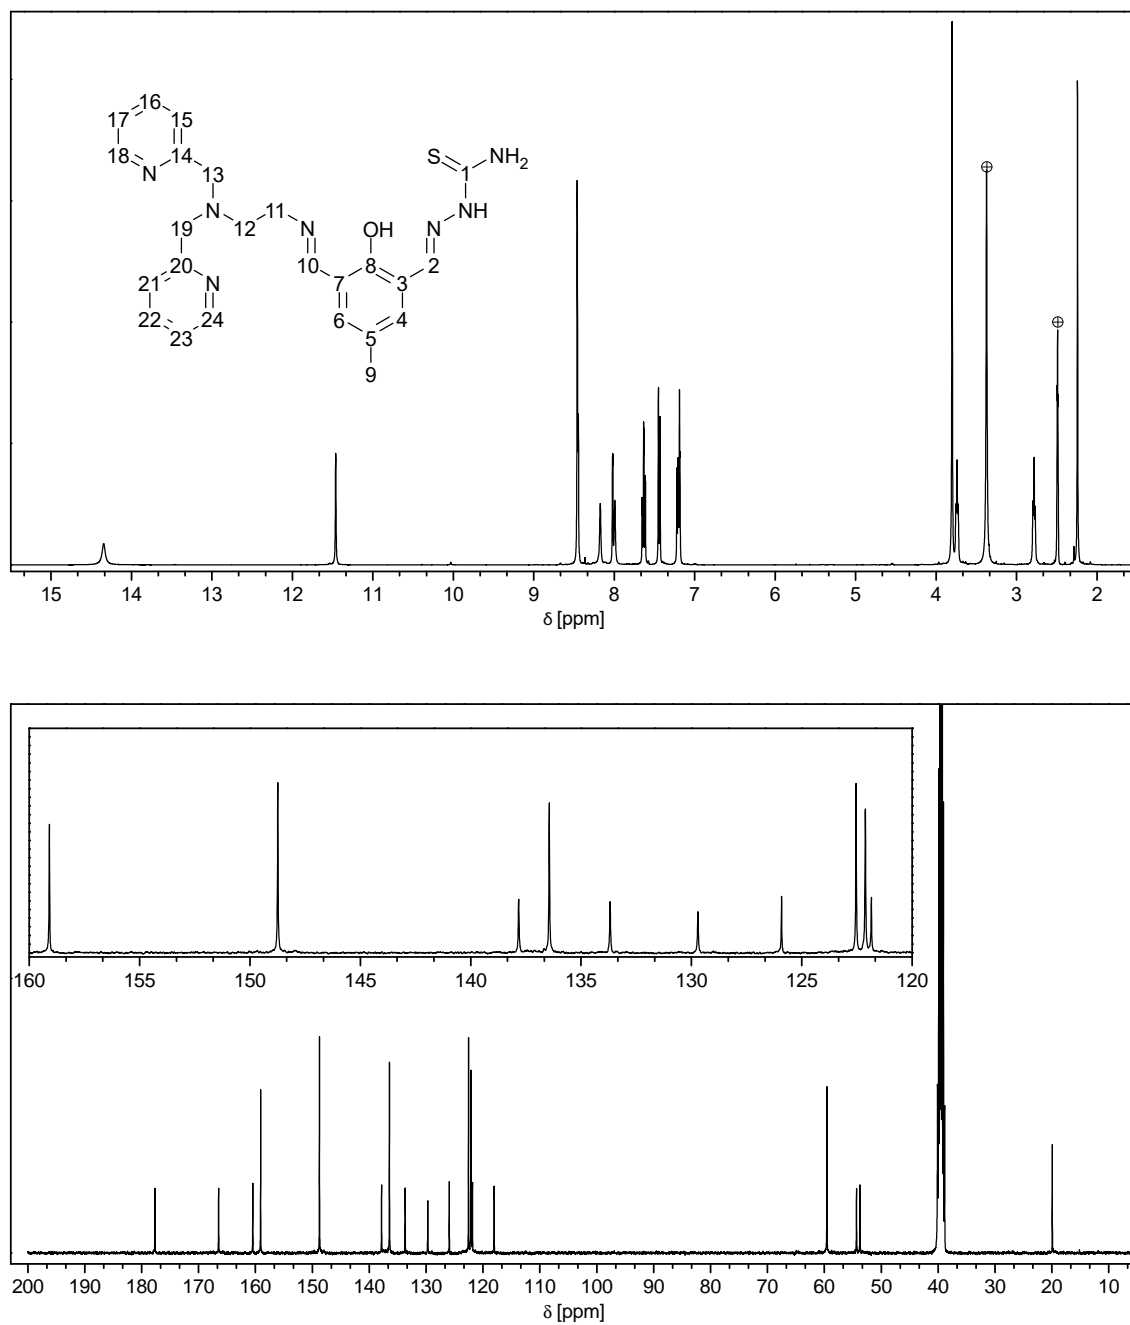

Figure S6: NMR spectra of H<sub>2</sub>tsc-hydra in DMSO-d<sub>6</sub>: (Top) <sup>1</sup>H NMR; marked peaks correspond to water and DMSO. (Bottom) <sup>13</sup>C{<sup>1</sup>H} NMR.

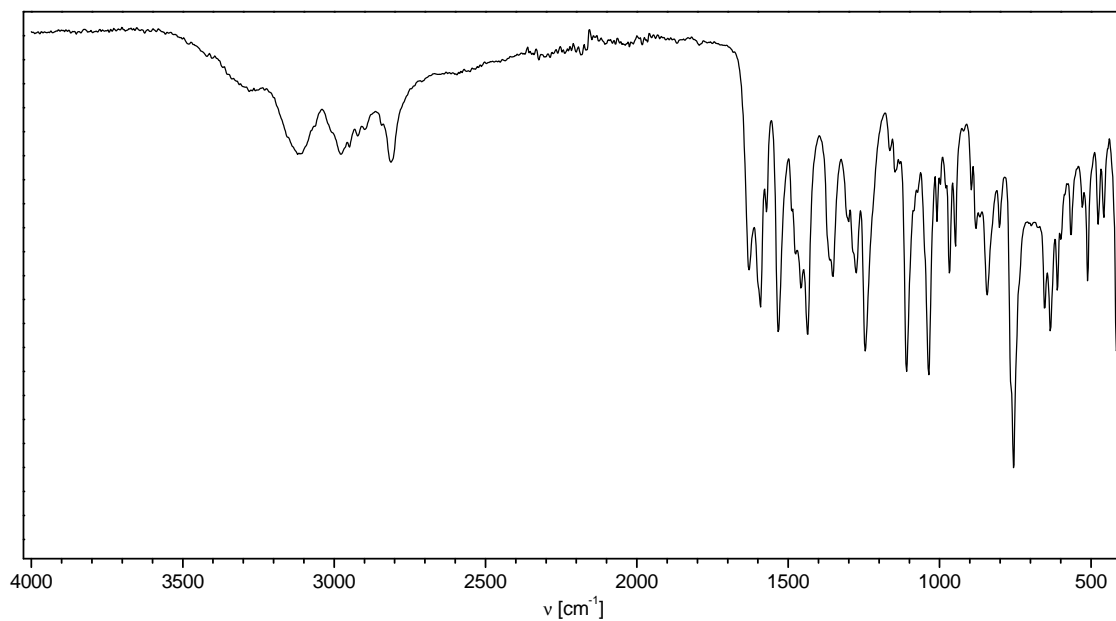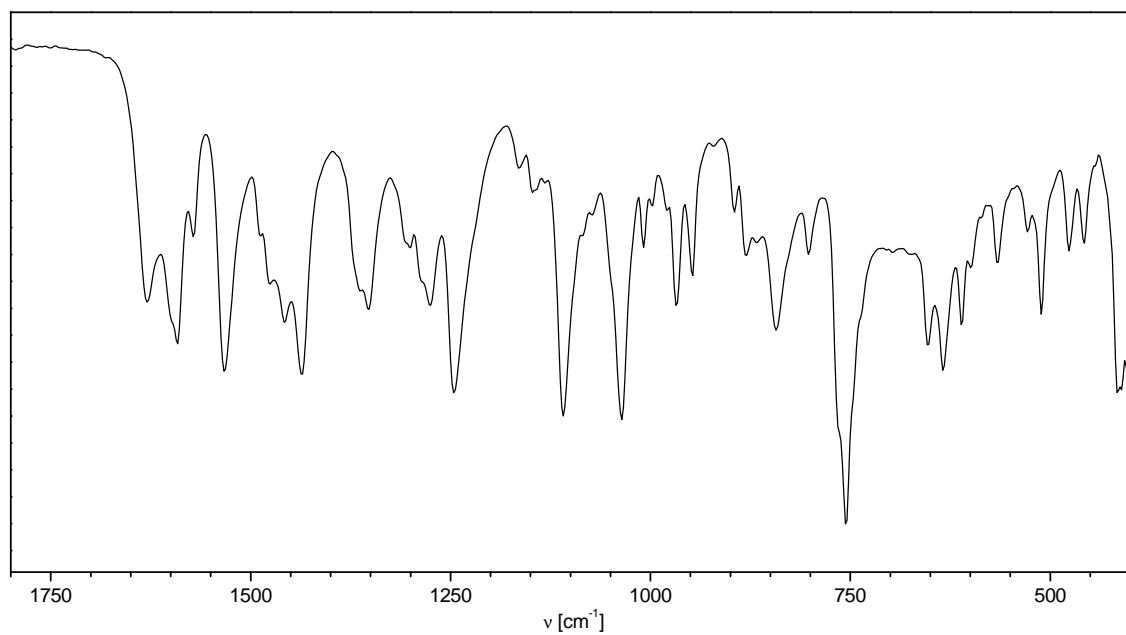

Figure S7: FT-IR spectra of H<sub>2</sub>tsc-hydra: (Top) Overview range from 4000–400 cm<sup>-1</sup>. (Bottom) Fingerprint region from 1800–400 cm<sup>-1</sup>. List of the positions of vibrational bands (in cm<sup>-1</sup>): 3117, 2977, 2947, 2922, 2895, 2810, 1630, 1591, 1570, 1531, 1456, 1435, 1364, 1353, 1305, 1275, 1247, 1165, 1145, 1108, 1035, 1010, 968, 948, 898, 879, 843, 801, 753, 653, 637, 611, 566, 529, 513, 477, 458, 420.

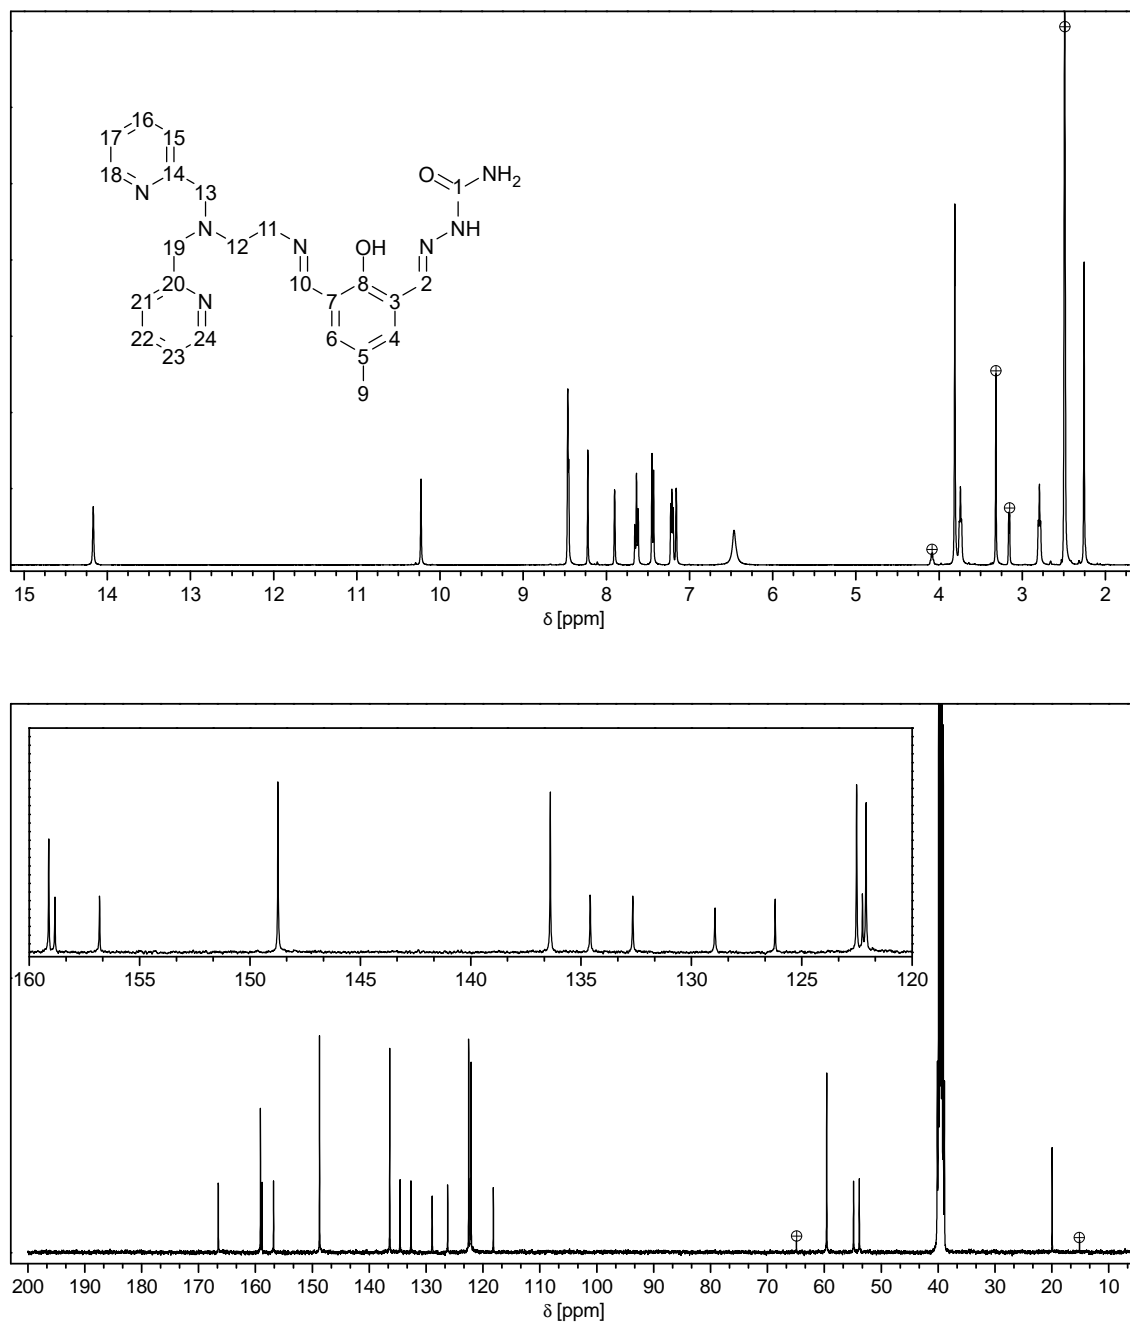

Figure S8: NMR spectra of H<sub>2</sub>sc-hydra in DMSO-d<sub>6</sub>: (Top) <sup>1</sup>H NMR; marked peaks correspond to water, methanol and DMSO. (Bottom) <sup>13</sup>C{<sup>1</sup>H} NMR; marked peaks are assigned to diethyl ether.

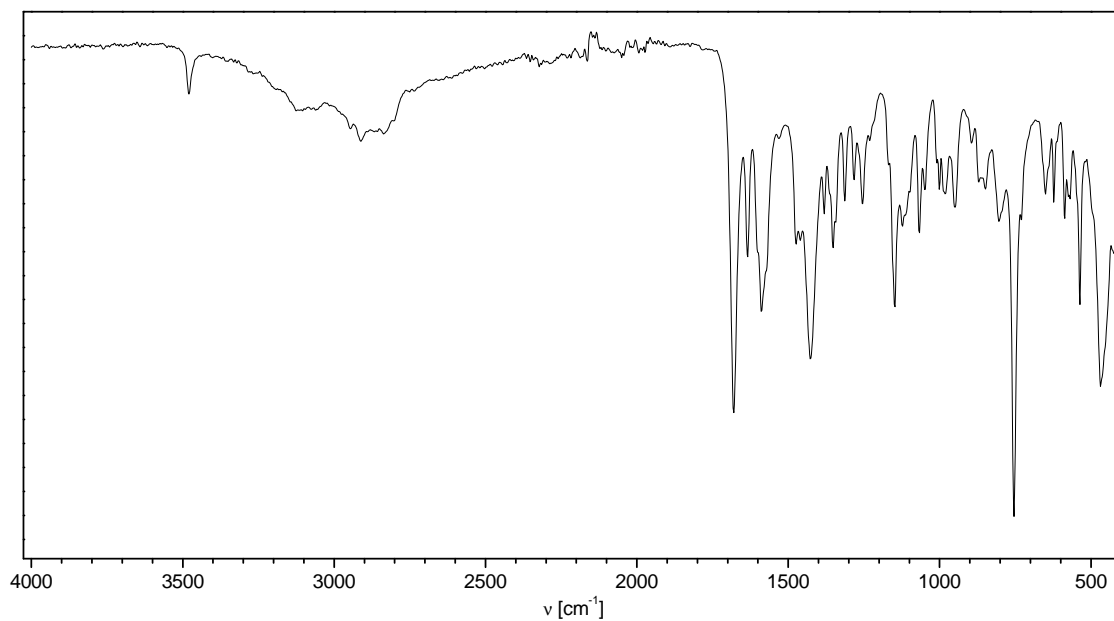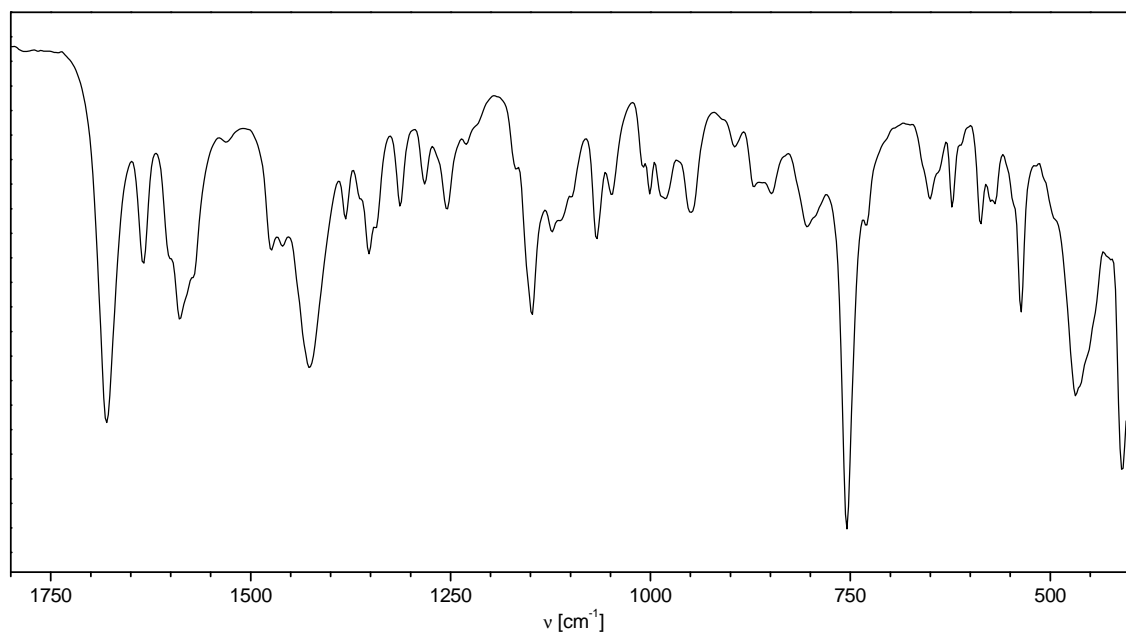

Figure S9: FT-IR spectra of H<sub>2</sub>sc-hydra: (Top) Overview range from 4000–400 cm<sup>-1</sup>. (Bottom) Fingerprint region from 1800–400 cm<sup>-1</sup>. List of the positions of vibrational bands (in cm<sup>-1</sup>): 3480, 3124, 3064, 2945, 2918, 2833, 1680, 1634, 1591, 1474, 1460, 1428, 1383, 1353, 1312, 1282, 1252, 1229, 1147, 1122, 1065, 1046, 1005, 984, 948, 898, 872, 849, 808, 756, 730, 650, 625, 589, 570, 538, 470, 412.

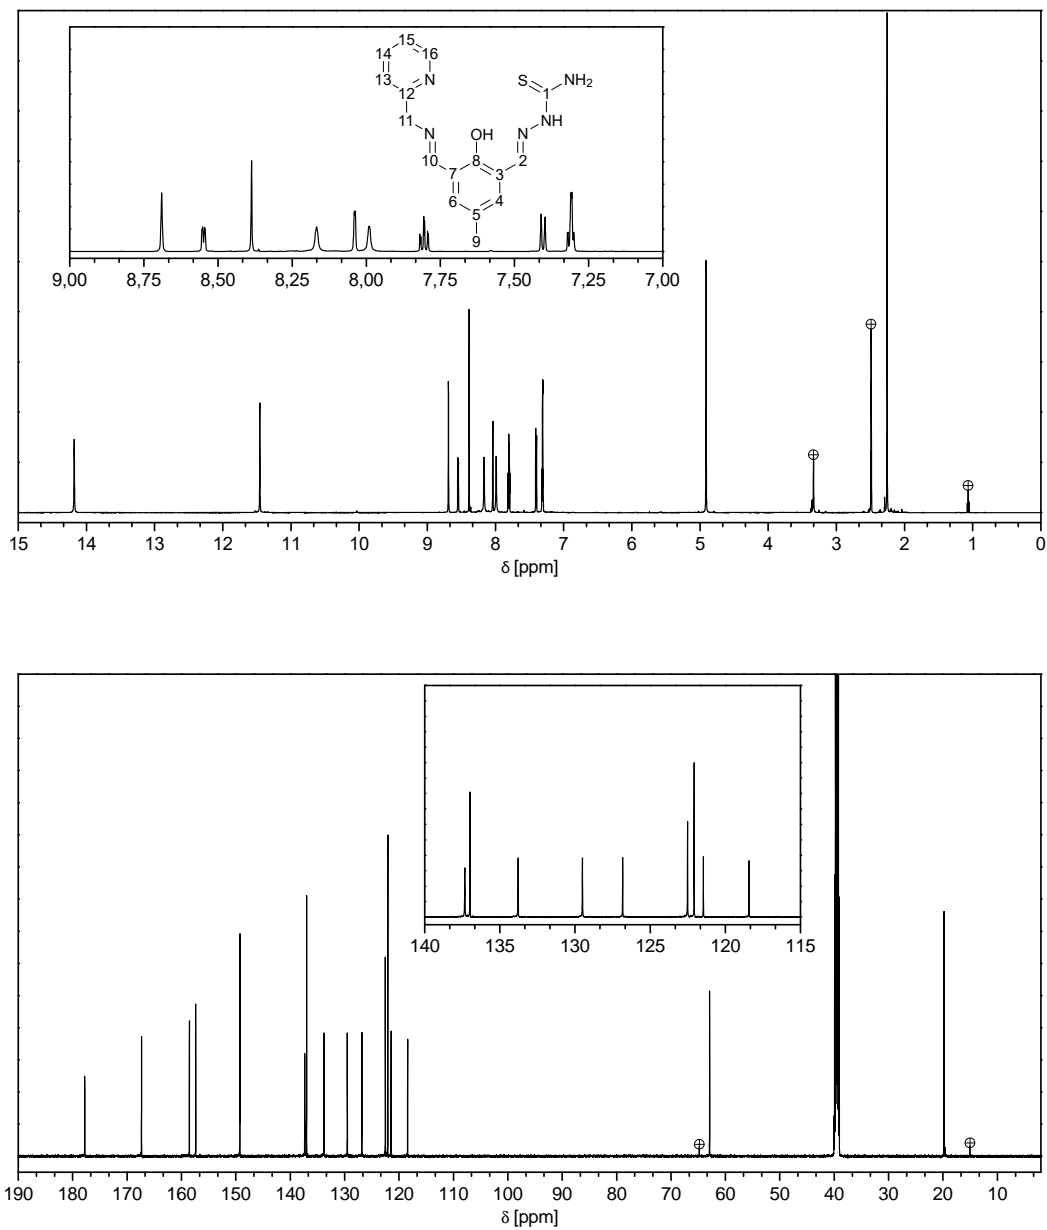

Figure S10: NMR spectra of H<sub>2</sub>tsc-ampy in DMSO-d<sub>6</sub>: (Top) <sup>1</sup>H NMR; marked peaks correspond to water, DMSO and diethyl ether. (Bottom) <sup>13</sup>C{<sup>1</sup>H} NMR; marked peaks correspond to diethyl ether.

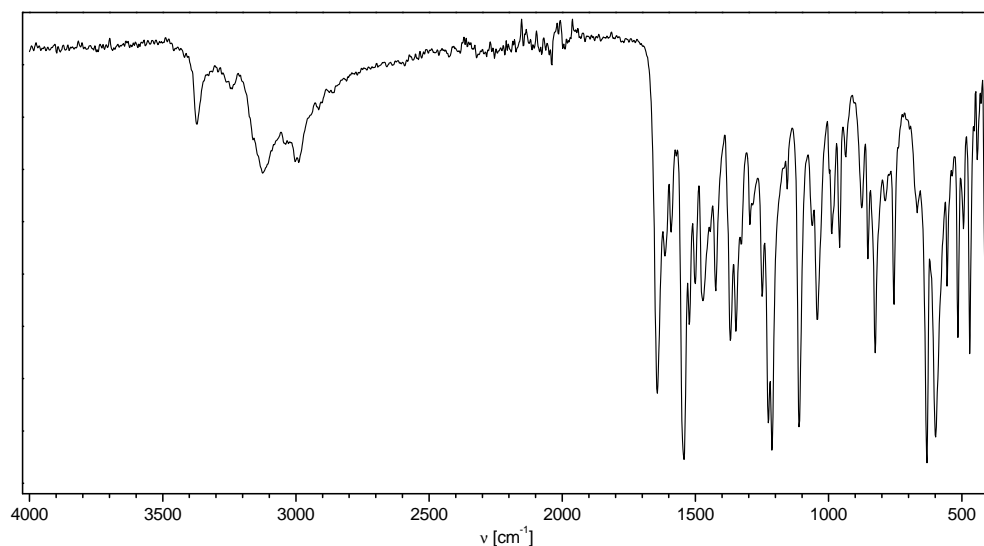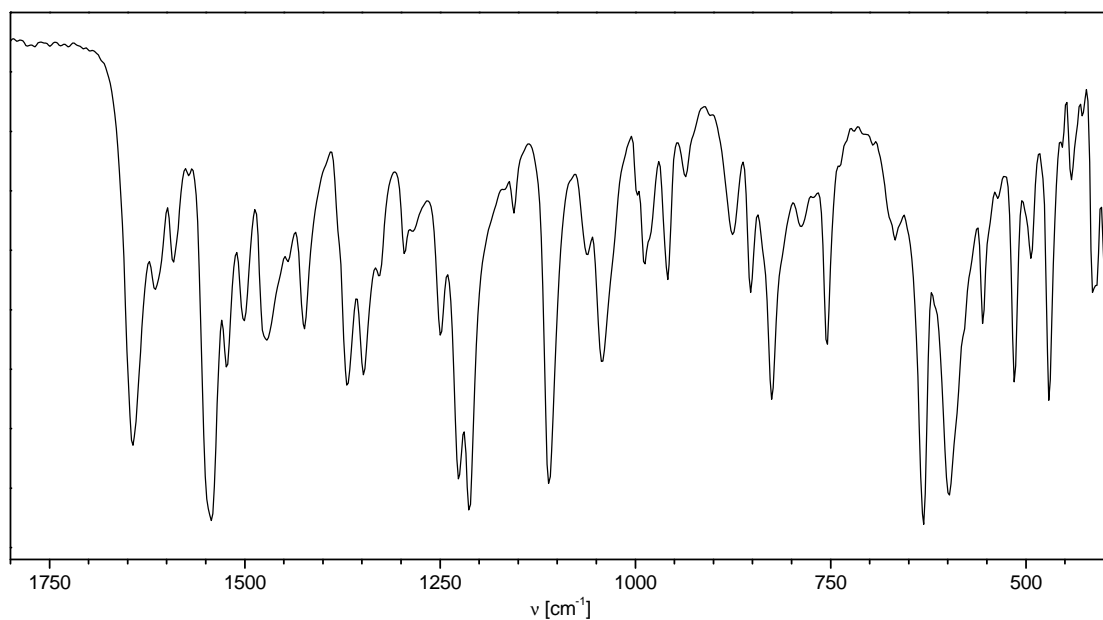

Figure S11: FT-IR spectra of H<sub>2</sub>tsc-ampy: (Top) Overview range from 4000–400 cm<sup>-1</sup>. (Bottom) Fingerprint region from 1800–400 cm<sup>-1</sup>. List of the positions of vibrational bands (in cm<sup>-1</sup>): 3374, 3125, 2992, 1640, 1612, 1588, 1544, 1522, 1499, 1471, 1422, 1368, 1347, 1295, 1248, 1227, 1211, 1154, 1108, 1065, 1042, 986, 960, 937, 873, 854, 826, 756, 669, 632, 599, 557, 515, 493, 470, 414.



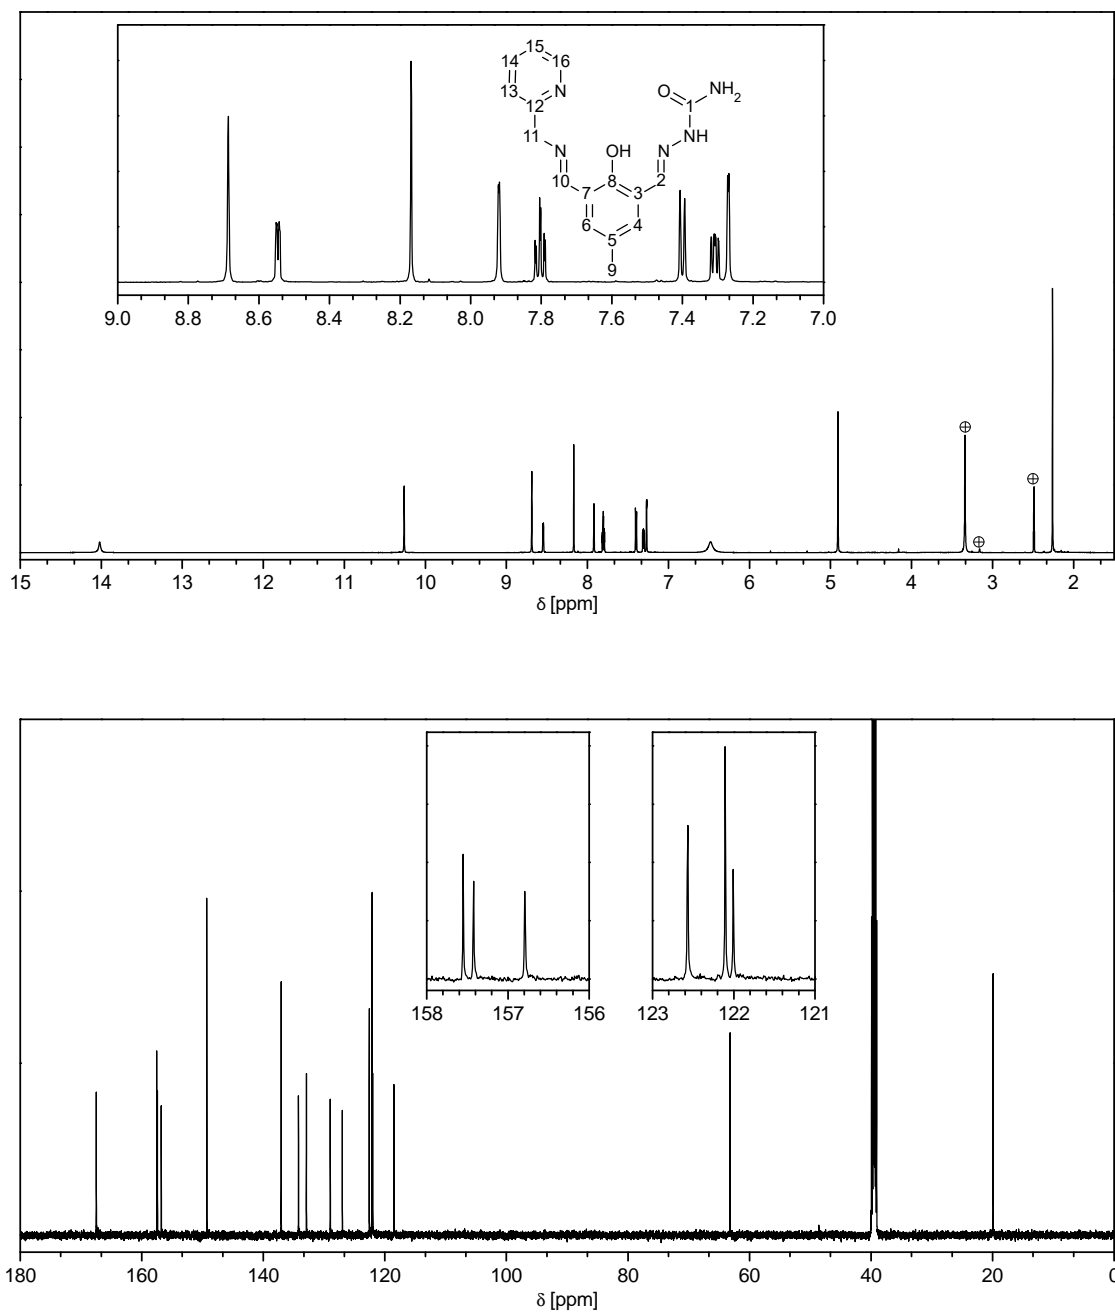

Figure S12: NMR spectra of H<sub>2</sub>sc-ampy in DMSO-d<sub>6</sub>: (Top) <sup>1</sup>H NMR; marked peaks correspond to water, methanol and DMSO. (Bottom) <sup>13</sup>C{<sup>1</sup>H} NMR.

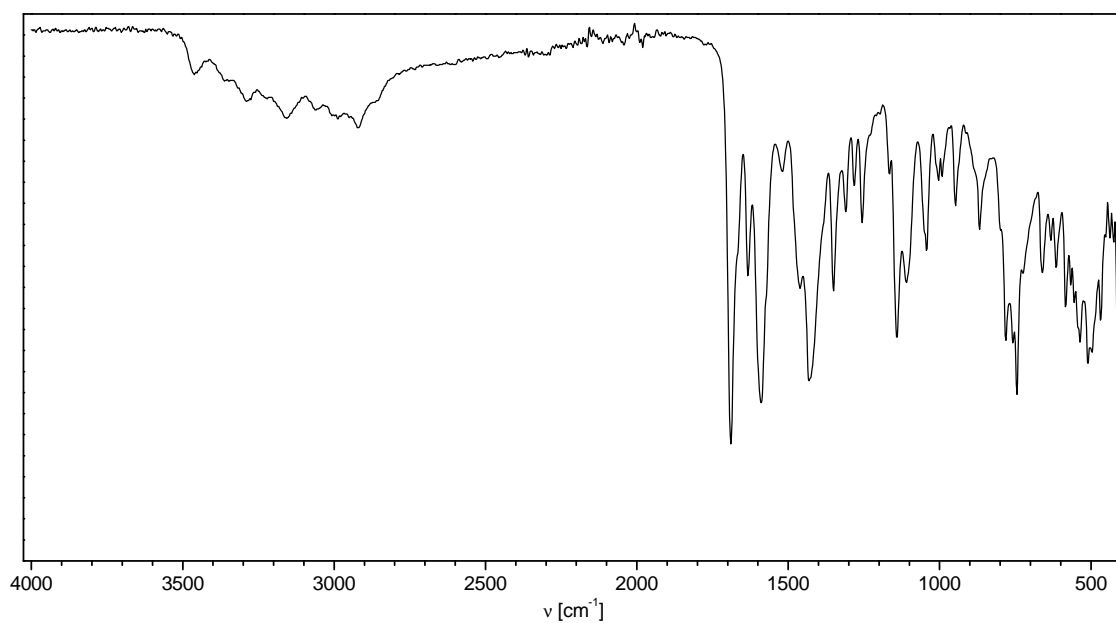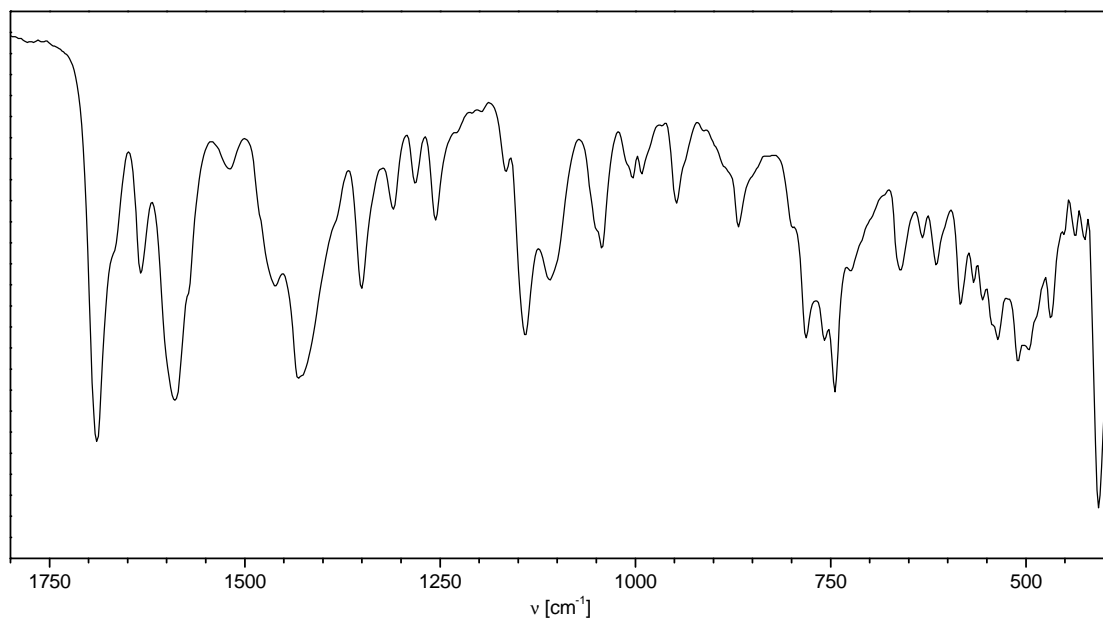

Figure S13: FT-IR spectra of H<sub>2</sub>sc-ampy: (Top) Overview range from 4000–400 cm<sup>-1</sup>. (Bottom) Fingerprint region from 1800–400 cm<sup>-1</sup>. List of the positions of vibrational bands (in cm<sup>-1</sup>): 3465, 3286, 3154, 2918, 1688, 1635, 1587, 1521, 1465, 1426, 1350, 1310, 1282, 1261, 1141, 1103, 1040, 1007, 991, 948, 869, 780, 742, 722, 661, 635, 617, 582, 538, 508, 495, 467.

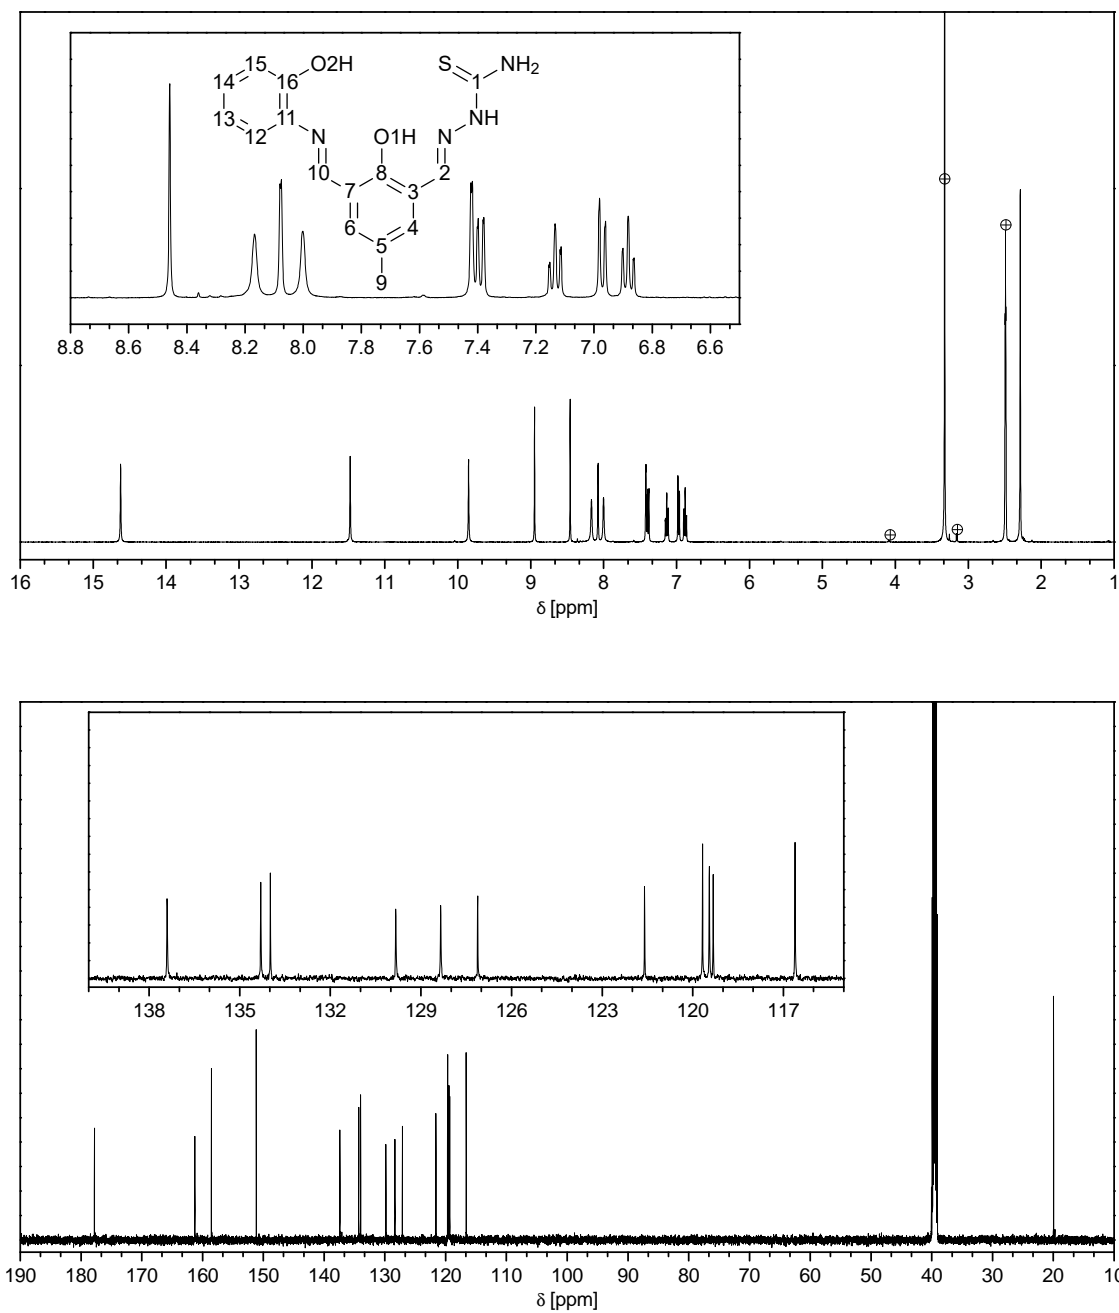

Figure S14: NMR spectra of H<sub>3</sub>tsc-amph in DMSO-d<sub>6</sub>: (Top) <sup>1</sup>H NMR; marked peaks correspond to water, methanol and DMSO. (Bottom) <sup>13</sup>C{<sup>1</sup>H} NMR.

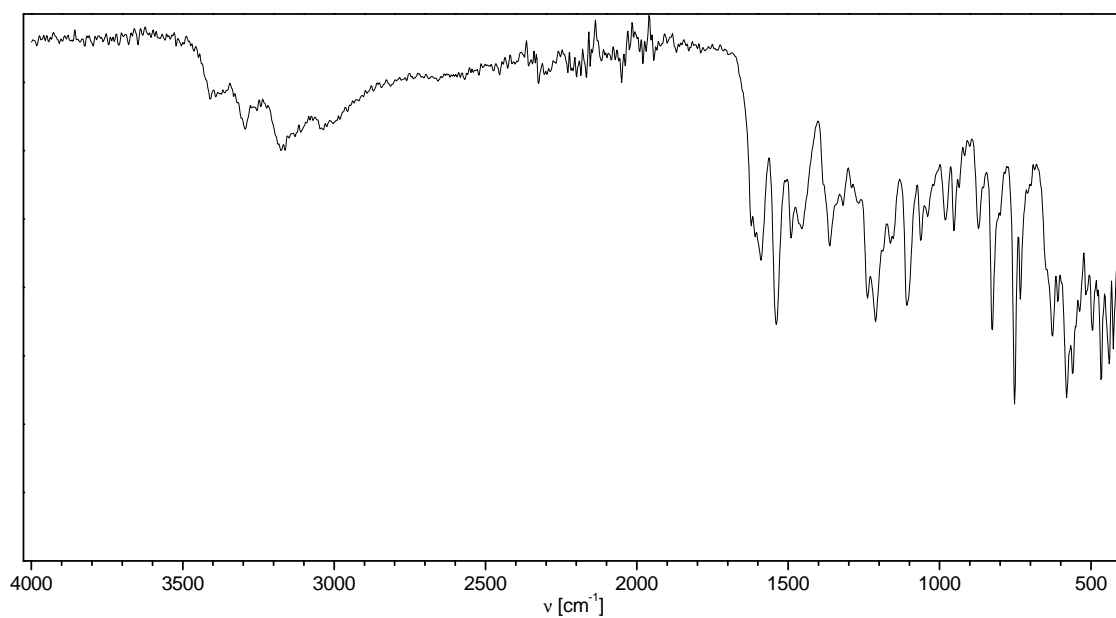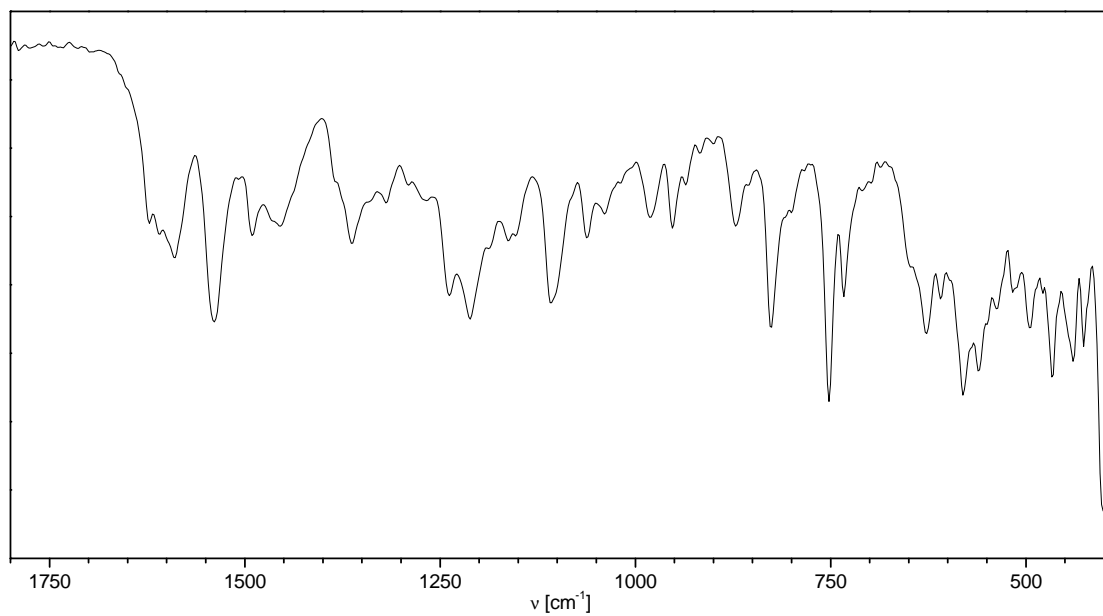

Figure S15: FT-IR spectra of H<sub>3</sub>tsc-amph: (Top) Overview range from 4000–400 cm<sup>-1</sup>. (Bottom) Fingerprint region from 1800–400 cm<sup>-1</sup>. List of the positions of vibrational bands (in cm<sup>-1</sup>): 3411, 3294, 3177, 1589, 1541, 1490, 1457, 1363, 1320, 1238, 1213, 1159, 1106, 1065, 1035, 979, 951, 935, 874, 828, 750, 732, 625, 605, 582, 561, 538, 495, 473, 439, 424.

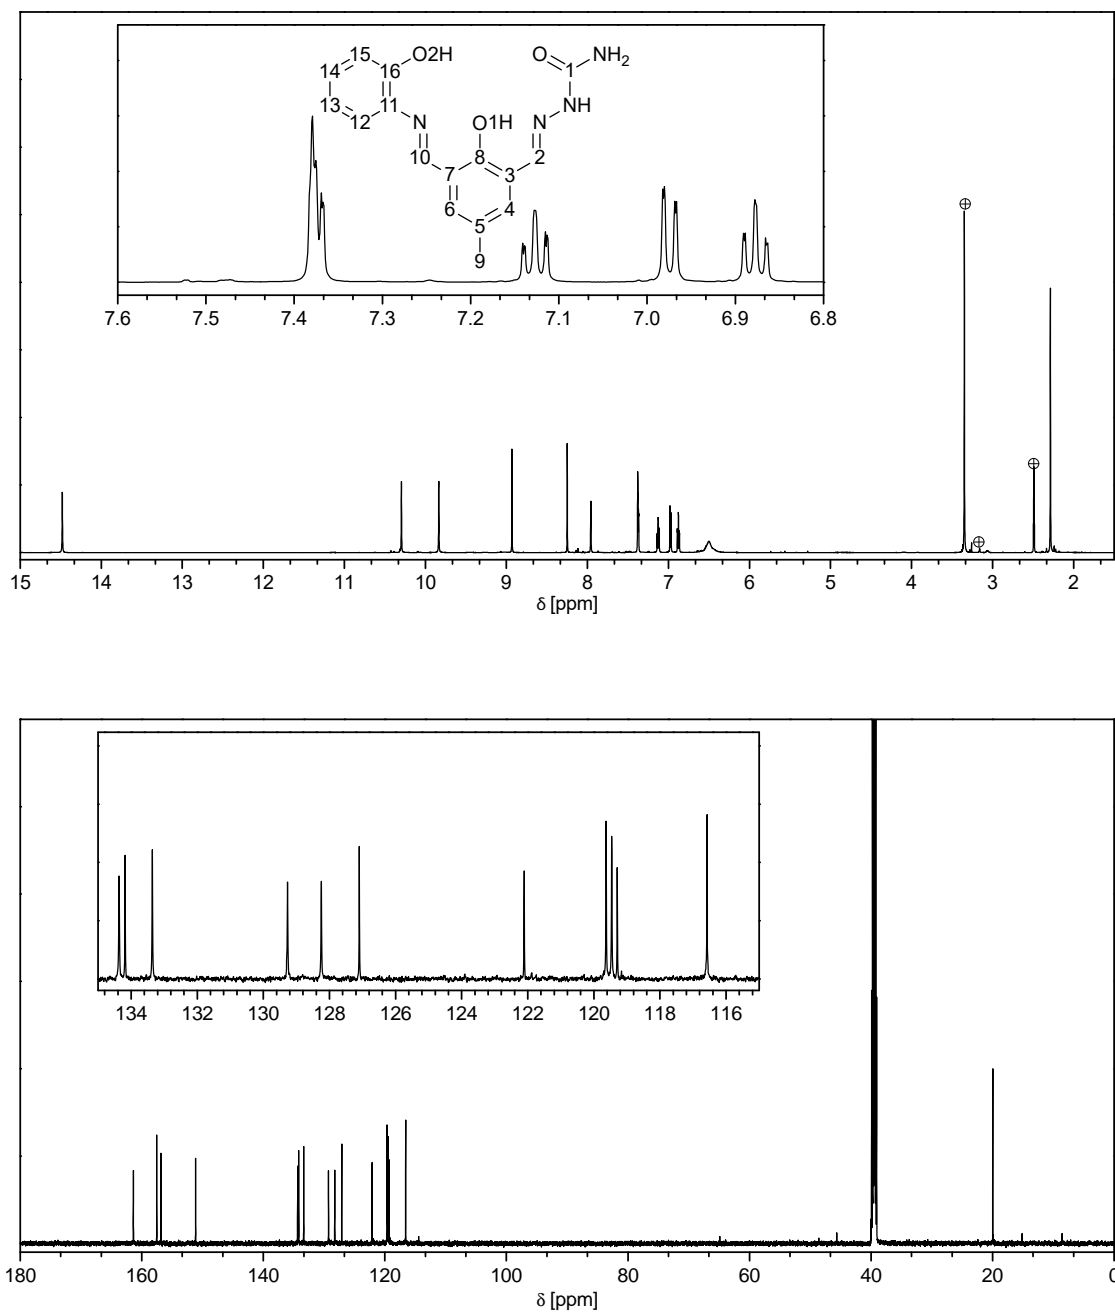

Figure S16: NMR spectra of H<sub>3</sub>sc-amph in DMSO-d<sub>6</sub>: (Top) <sup>1</sup>H NMR; marked peaks correspond to water, methanol and DMSO. (Bottom) <sup>13</sup>C{<sup>1</sup>H} NMR.

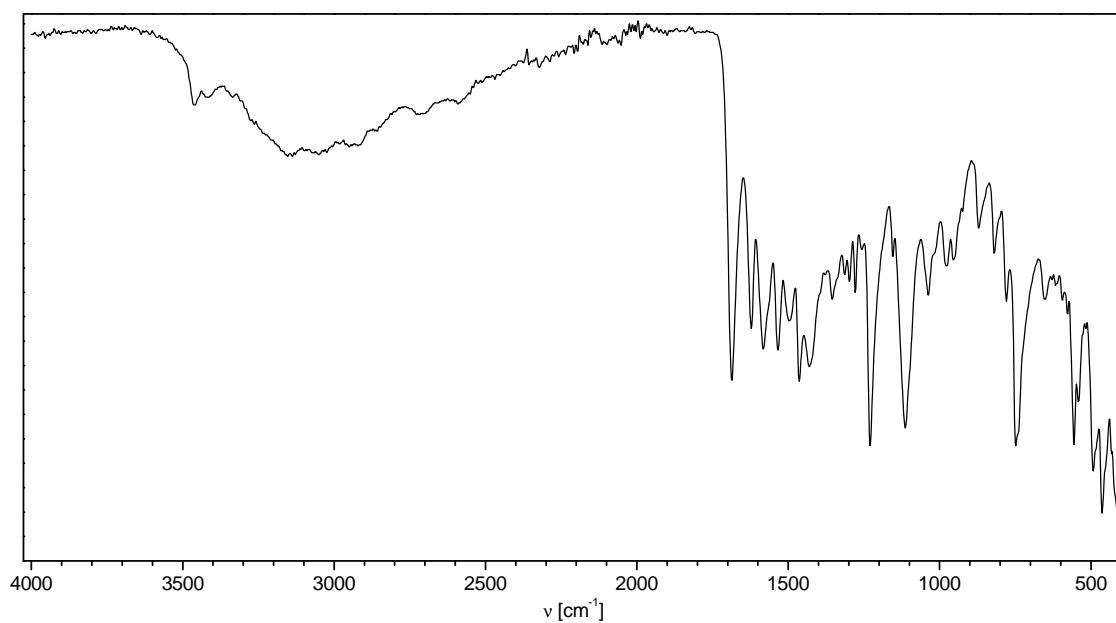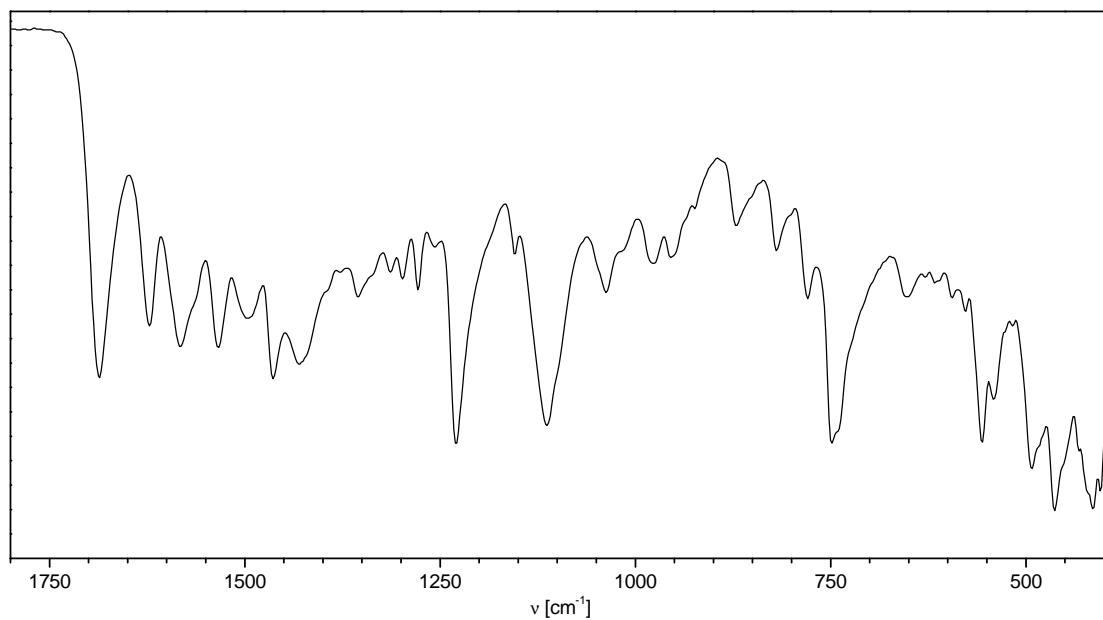

Figure S17: FT-IR spectra of H<sub>3</sub>sc-amph: (Top) Overview range from 4000–400 cm<sup>-1</sup>. (Bottom) Fingerprint region from 1800–400 cm<sup>-1</sup>. List of the positions of vibrational bands (in cm<sup>-1</sup>): 3470, 3146, 3047, 2700, 1683, 1620, 1579, 1533, 1500, 1465, 1434, 1355, 1282, 1231, 1157, 1111, 1035, 976, 956, 872, 821, 783, 750, 656, 556, 541, 493, 462, 414.

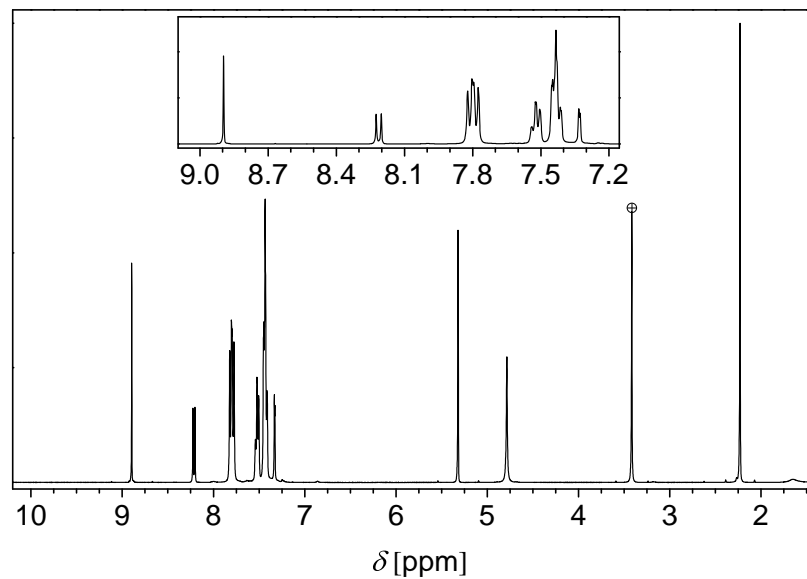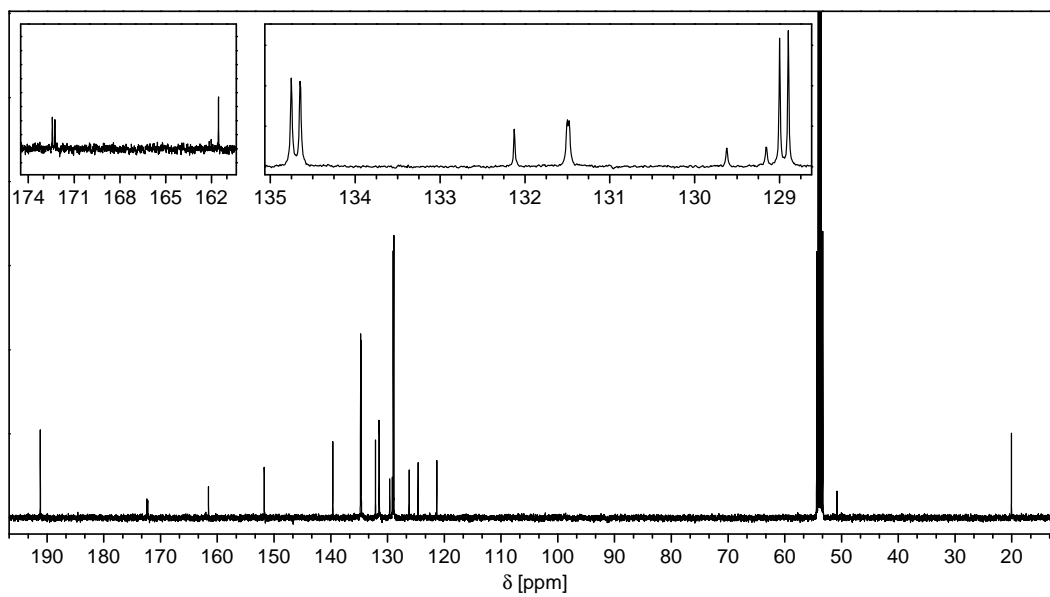

Figure S18: NMR spectra of  $[\text{Ni}(\text{tsc-difo})\text{PPh}_3]$  in  $\text{CD}_2\text{Cl}_2$ : (Top)  $^1\text{H}$  NMR; marked peak corresponds to methanol which is included in the crystal packing. (Bottom)  $^{13}\text{C}\{^1\text{H}\}$  NMR. For notation of the ligand atoms cf. Fig. S2.

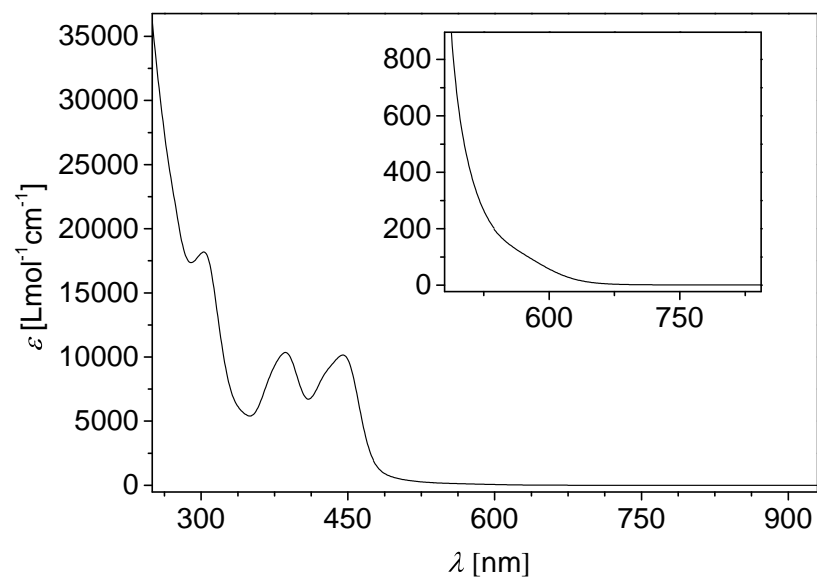

Figure S19: UV/Vis spectrum of  $[\text{Ni}(\text{tsc-difo})\text{PPh}_3]$  in dichloromethane.



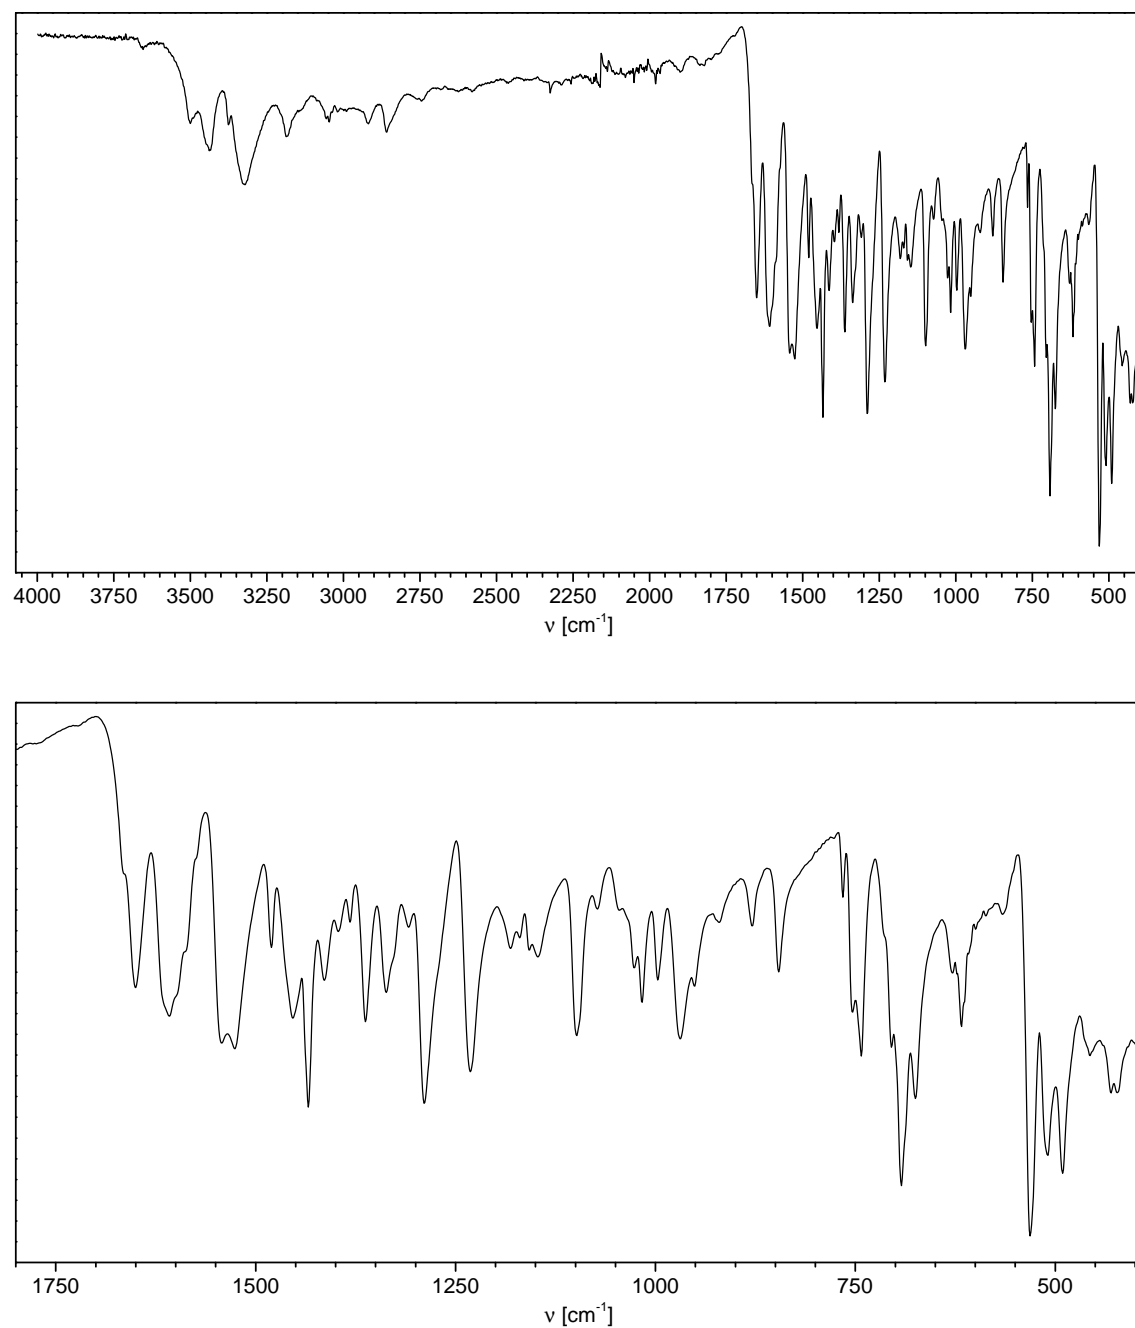

Figure S20: FT-IR spectra of  $[\text{Ni}(\text{tsc-difo})\text{PPh}_3]$ : (Top) Overview range from 4000–400  $\text{cm}^{-1}$ . (Bottom) Fingerprint region from 1800–400  $\text{cm}^{-1}$ . List of the positions of vibrational bands (in  $\text{cm}^{-1}$ ): 3503, 3438, 3375, 3324, 3182, 3047, 2916, 2858, 1649, 1603, 1545, 1526, 1480, 1454, 1434, 1413, 1396, 1381, 1362, 1335, 1309, 1287, 1229, 1181, 1145, 1099, 1072, 1026, 1014, 997, 966, 952, 920, 877, 843, 766, 754, 742, 693, 674, 616, 565, 531, 507, 488, 457, 428.

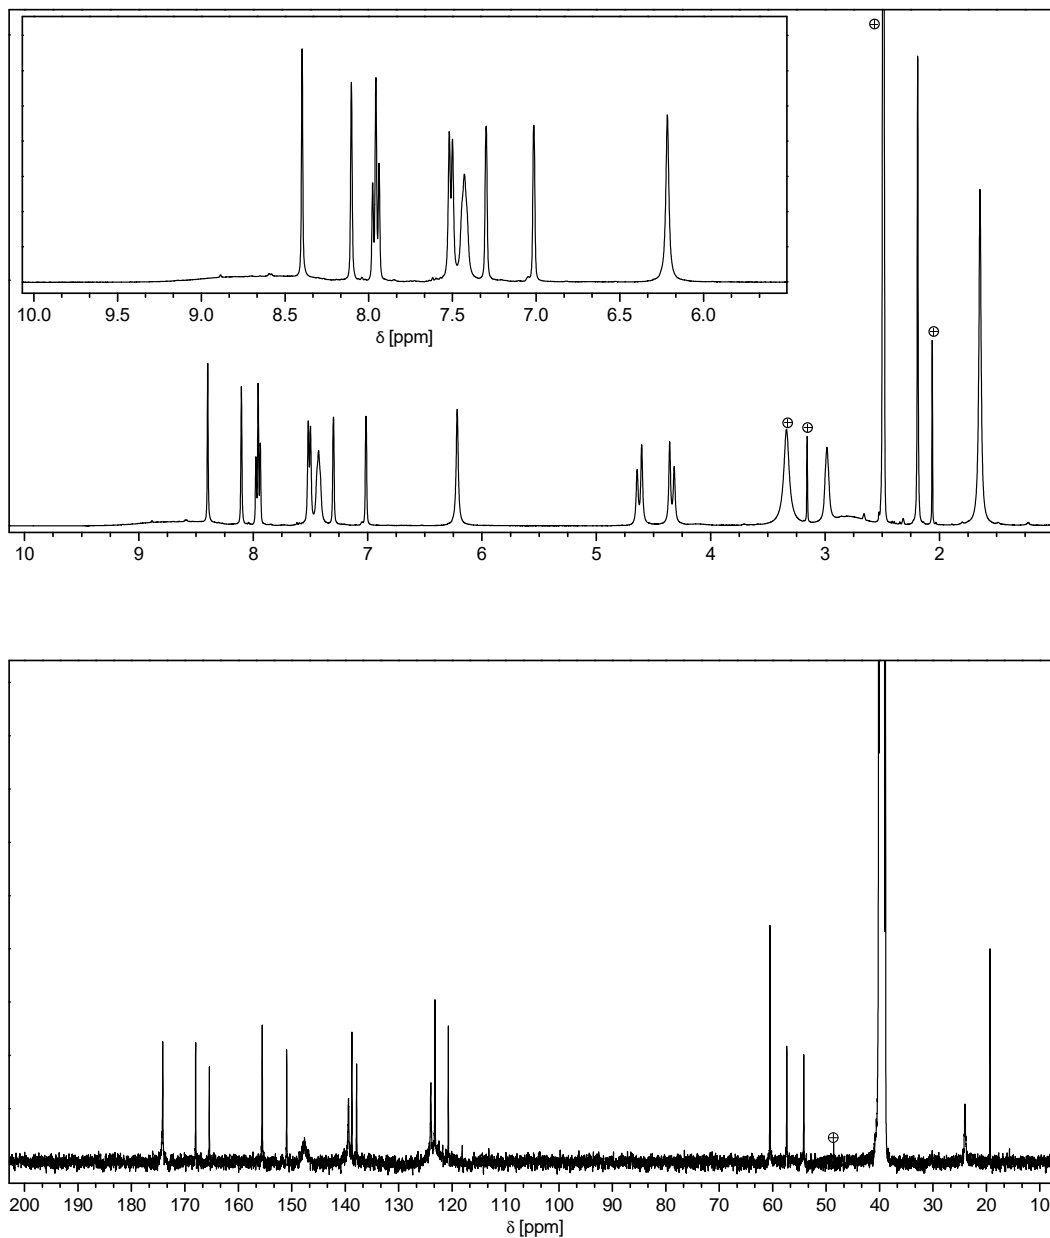

Figure S21: NMR spectra of  $[\text{Zn}_2(\text{tsc-hydra})(\text{OAc})_2]$  in  $\text{DMSO-d}_6$ : (Top)  $^1\text{H}$  NMR; marked peak correspond to DMSO, methanol, acetonitrile and water. (Bottom)  $^{13}\text{C}\{^1\text{H}\}$  NMR; marked peak corresponds to methanol. For notation of the ligand atoms cf. Fig. S10.

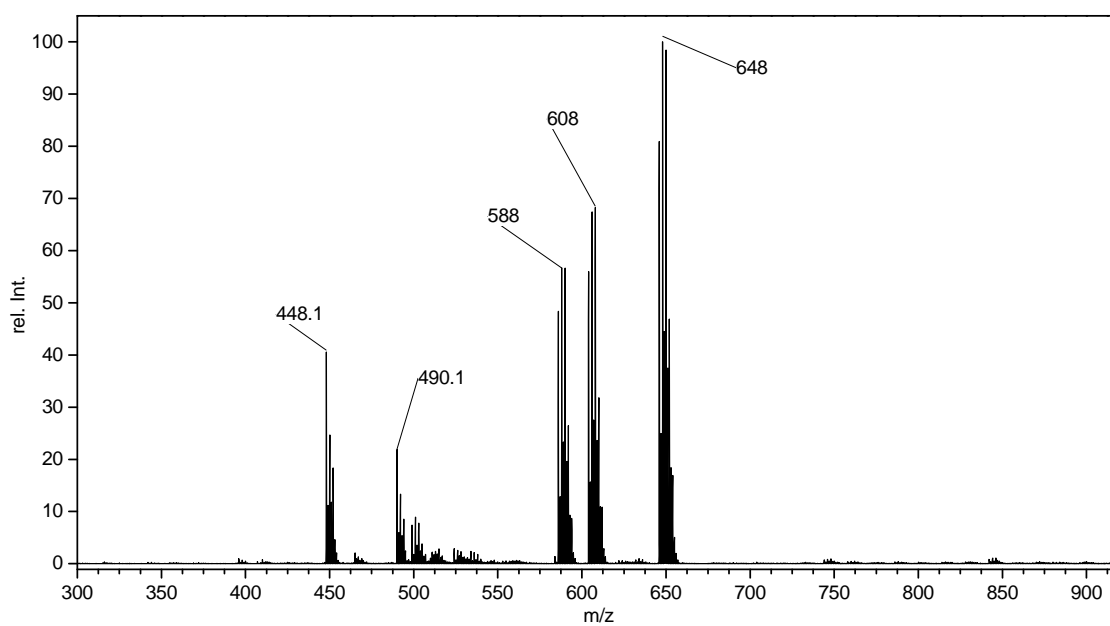

Figure S22: Mass spectrum in ESI positive mode of  $[\text{Zn}_2(\text{tsc-hydra})(\text{OAc})_2]$  in acetonitrile.

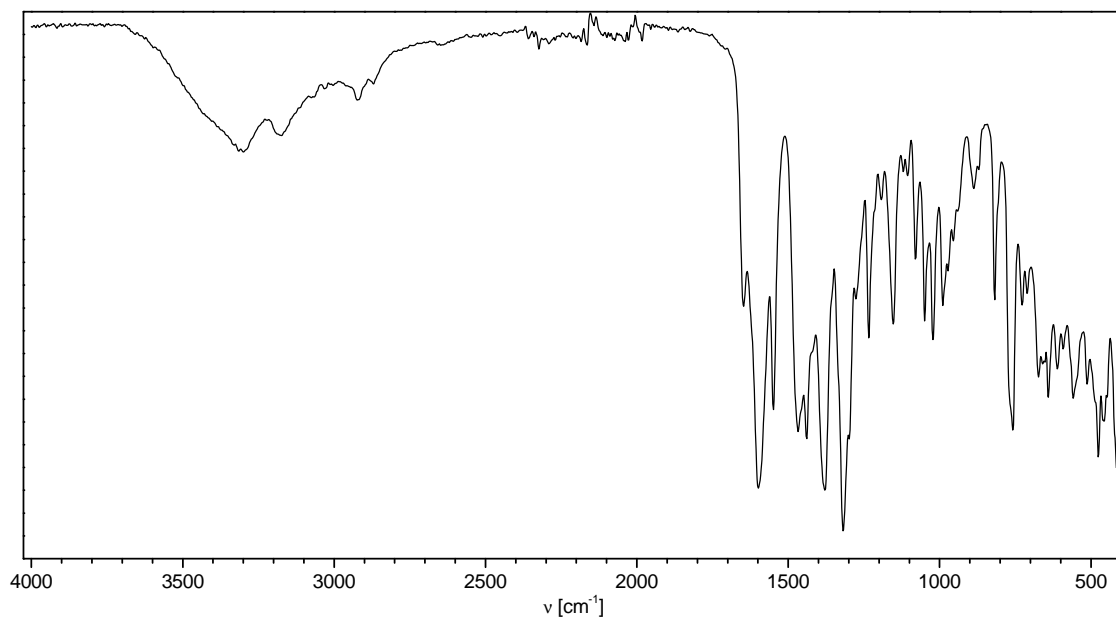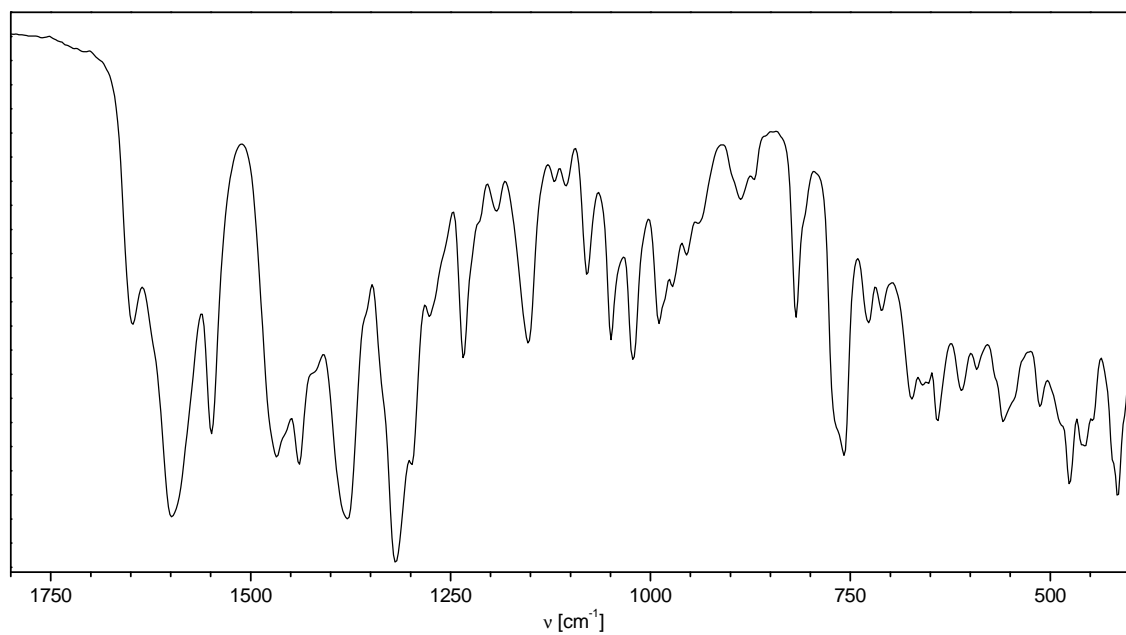

Figure S23: FT-IR spectra of  $[\text{Zn}_2(\text{tsc-hydra})(\text{OAc})_2]$ : (Top) Overview range from 4000–400  $\text{cm}^{-1}$ . (Bottom) Fingerprint region from 1800–400  $\text{cm}^{-1}$ . List of the positions of vibrational bands (in  $\text{cm}^{-1}$ ): 3309, 3180, 2921, 1649, 1598, 1550, 1466, 1438, 1378, 1319, 1296, 1276, 1232, 1193, 1152, 1104, 1079, 1051, 1019, 990, 971, 953, 937, 886, 820, 758, 728, 710, 676, 642, 614, 594, 561, 516, 477, 458, 415.

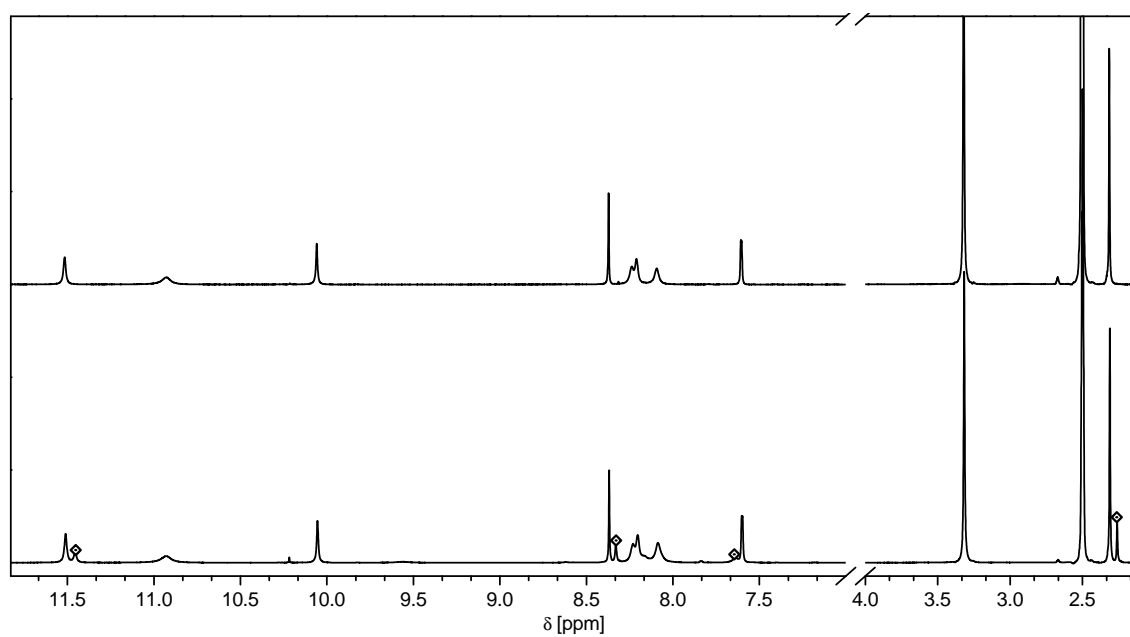

Figure S24: Comparison of the  $^1\text{H}$  NMR spectra of  $\text{H}_2\text{tsc-difo}$  before (lower line) and after purification by Soxhlet extraction with chloroform; both spectra were measured in  $\text{DMSO-d}_6$ ; marked signals correspond to the symmetric byproduct.

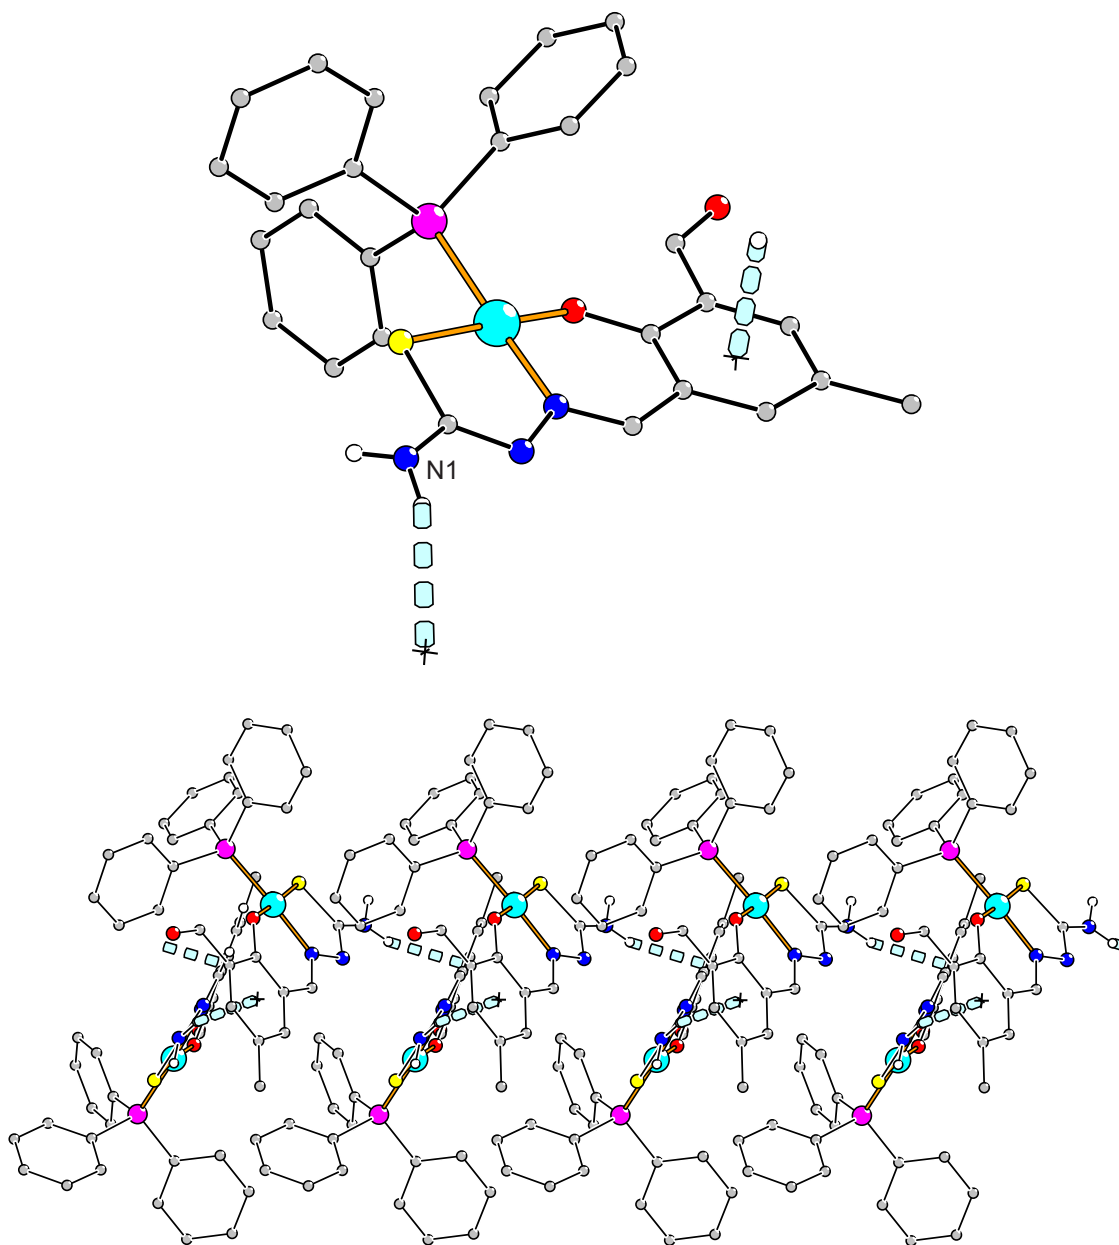

Figure S25: NH/ $\pi$  interactions in the crystal structure of  $[\text{Ni}(\text{tsc-difo})\text{PPh}_3] \cdot 2\text{MeOH}$ : (Top) Interactions at one complex molecule. (Bottom) Resulting zig-zag chain like arrangement along the  $[010]$  direction. Pertinent distances and angles:  $\text{N1} \cdots \text{centroid}$  326 pm,  $\text{H} \cdots \text{centroid}$  242 pm,  $\text{N1-H} \cdots \text{centroid}$   $162^\circ$ .

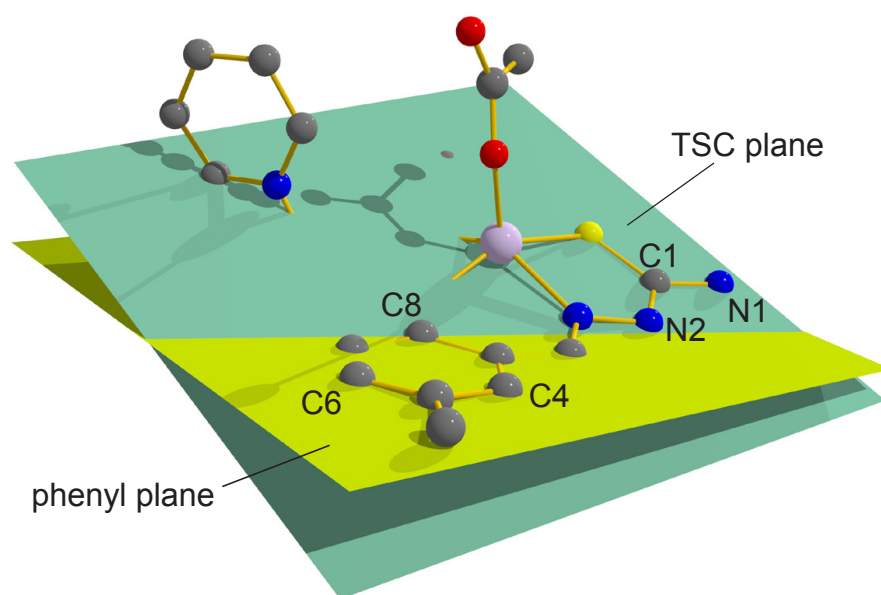

Figure S26: Representation of the mean planes for the thiosemicarbazone (N1, N2, C1) and the phenolate fragment (C4, C6, C8) in the crystal structure of  $[\text{Zn}_2(\text{tsc-hydra})(\text{OAc})_2] \cdot \text{MeCN} \cdot \text{H}_2\text{O}$  indicating the rotation about the C2–C3 bond.

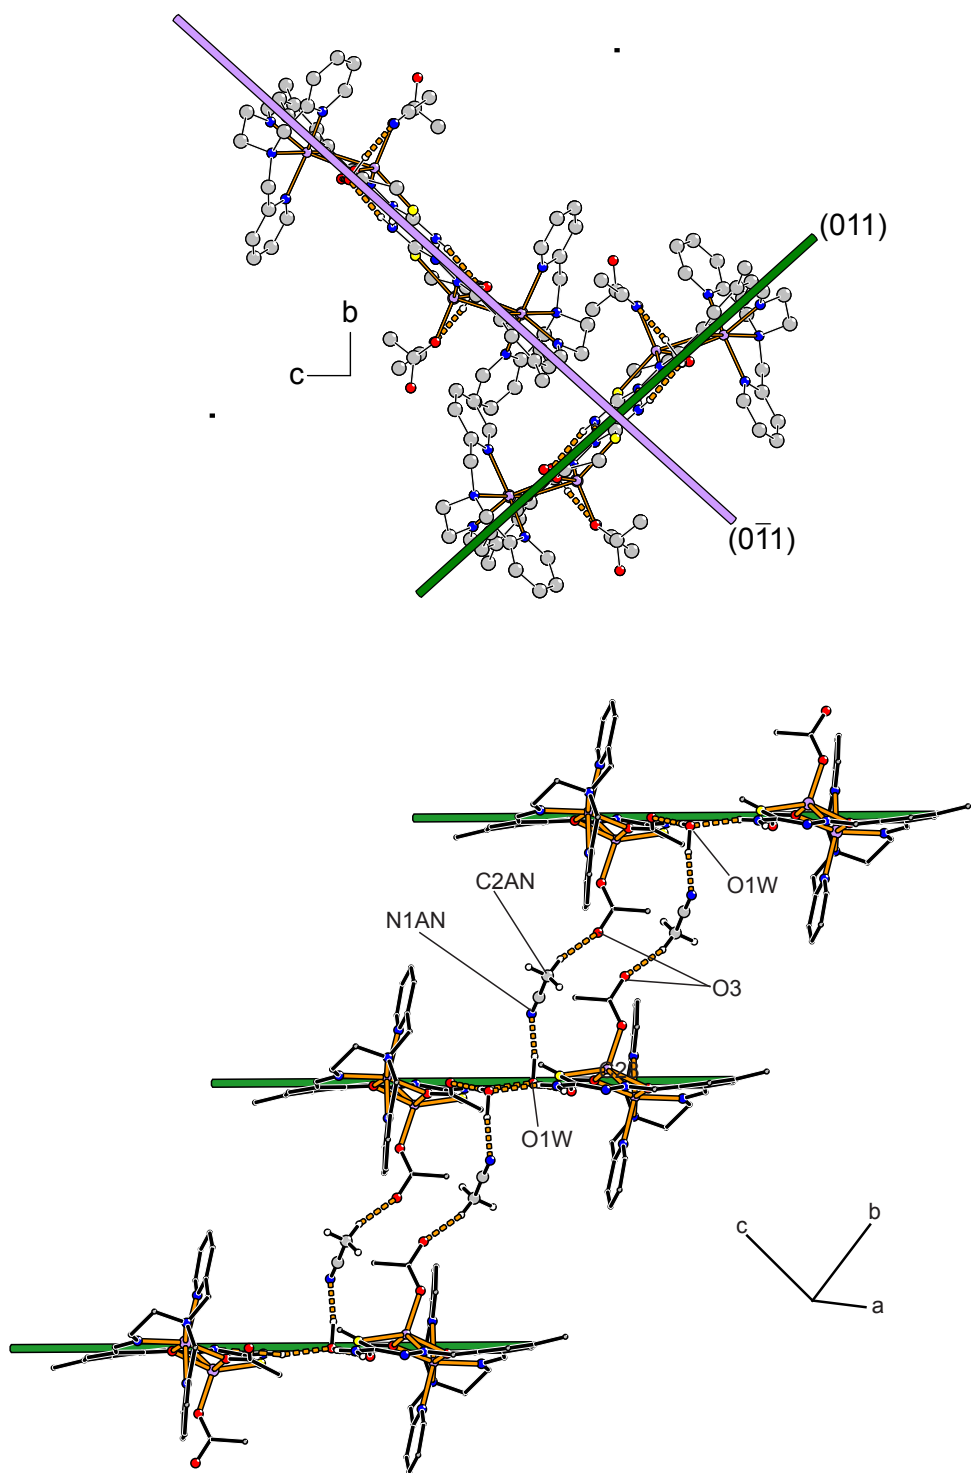

Figure S27: (Top) Representation of the two orientations of the hydrogen bonded chains along the  $[100]$  direction in the crystal structure of  $[\text{Zn}_2(\text{tsc-hydra})(\text{OAc})_2] \cdot \text{MeCN} \cdot \text{H}_2\text{O}$ . (Bottom) Interaction of the acetonitrile molecules with chains of the same orientation. Pertinent distances:  $\text{O1W} \cdots \text{N1AN}$  298.4(9) and  $\text{O3} \cdots \text{C2AN}$  318.2(9) pm.



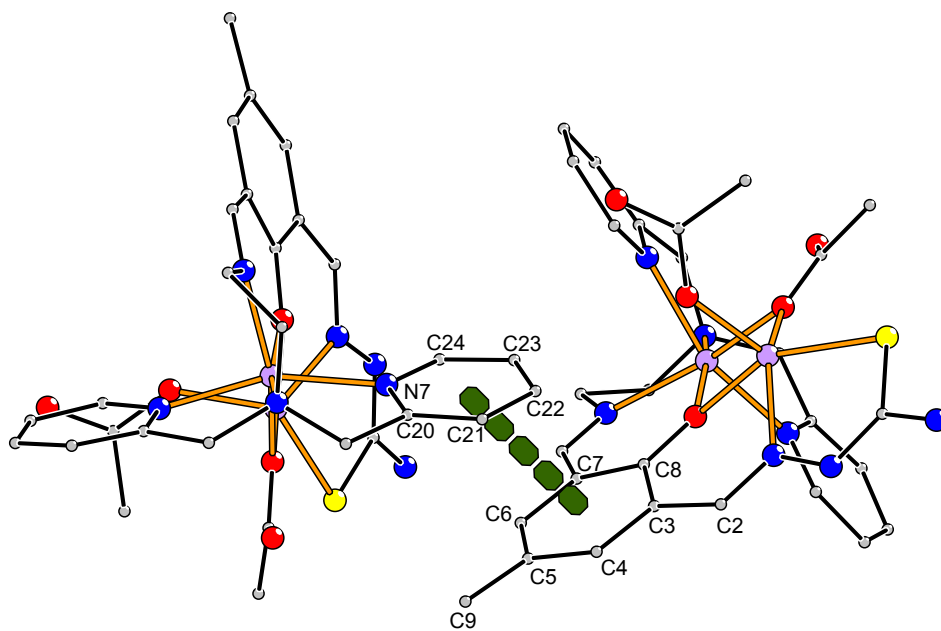

Figure S28: Representation of the  $\pi$ - $\pi$  interaction in the crystal structure of  $[\text{Zn}_2(\text{tsc-hydra})(\text{OAc})_2] \cdot \text{MeCN} \cdot \text{H}_2\text{O}$ . Pertinent data: centroid  $\cdots$  centroid distance 383.5 pm, shortest C-C contact 346 pm, angle between  $\pi$  planes  $19^\circ$ .
